# Supplementary material for: Irrigation and avifaunal change in coastal Northwest Mexico: has irrigated habit attracted threatened migratory species?
Source: PeerJ. 2015 Aug 20;3:e1187. doi: 10.7717/peerj.1187 (PMC4548487; doi:10.7717/peerj.1187)
Supplement: Supplemental Information 1 [file peerj-03-1187-s001.xlsx]

## Sheet: Sheet2
Count of FAMILY	Column Labels
Row Labels	5	6	7	8	9	Grand Total
Agelaius phoeniceus				1		1
Aimophila botterii	7					7
Aimophila carpalis	9	9	1		1	20
Aimophila ruficeps		14	4			18
Amazilia rutila	1	1				2
Amazilia violiceps		16		15	3	34
Amphispiza bilineata		2	1			3
Aphelocoma ultramarina	1					1
Arremonops rufivirgatus	1	1				2
Atthis heloisa	1					1
Attila spadiceus			1			1
Auriparus flaviceps	8	6	1		1	16
Baeolophus wollweberi		4	8			12
Basileuterus rufifrons			2			2
Cacicus melanicterus		27				27
Calocitta colliei	1	6				7
Calypte anna					1	1
Camptostoma imberbe	9	4		1		14
Campylorhynchus brunneicapillus	2	4	1			7
Cardinalis cardinalis	7	5		2		14
Cardinalis sinuatus	2	5				7
Carduelis notata		6	4			10
Carduelis psaltria		2		4		6
Carpodacus mexicanus	12	21		3	1	37
Catharus aurantiirostris	1					1
Catharus ustulatus					3	3
Certhia americana		3	9			12
Chondestes grammacus				1		1
Coccothraustes abeillei		2	8			10
Coccyzus americanus		3				3
Coccyzus erythropthalmus					1	1
Colaptes auratus		6	1			7
Colaptes chrysoides	5	2	1	1	1	10
Contopus pertinax		3	4			7
Contopus sordidulus	5					5
Corvus corax		4				4
Corvus sinaloae	8	10	1	4	1	24
Crotophaga sulcirostris	1	7	2	8	4	22
Cyanocitta stelleri		2	3			5
Cyanocorax beecheii	2	8				10
Cynanthus latirostris	1	5	1	2	1	10
Dendroica coronata					1	1
Dendroica petechia	19					19
Dryocopus lineatus		3				3
Empidonax affinis		1				1
Empidonax difficilis	3			1	1	5
Empidonax traillii	8	6			1	15
Euphonia affinis					1	1
Geococcyx californianus	2	5		1		8
Geothlypis trichas	6	7			1	14
Granatellus venustus	2					2
Heliomaster constantii	1	18			1	20
Hylocharis leucotis			3			3
Icteria virens	5	10		4	3	22
Icterus bullockii	2	2				4
Icterus cucullatus	3	4				7
Icterus pustulatus		18	1			19
Icterus spurius		4		1	3	8
Icterus wagleri		2				2
Lepidocolaptes leucogaster		1	6			7
Melanerpes chrysogenys		1				1
Melanerpes formicivorus		2	8			10
Melanerpes hypopolius			1			1
Melanerpes uropygialis	4	8	5	1		18
Melanotis caerulescens	2	2	1			5
Melospiza melodia		2			1	3
Mimus polyglottos				1		1
Mitrephanes phaeocercus		3	7			10
Molothrus aeneus	9	8	1	2	1	21
Molothrus ater	3	4		1	2	10
Myadestes occidentalis		5	5			10
Myiarchus cinerascens	2	6			1	9
Myiarchus nuttingi	4	3				7
Myiarchus tuberculifer	5	11	8	2	3	29
Myiarchus tyrannulus	13	9			4	26
Myioborus miniatus		7	3			10
Myiodynastes luteiventris		5				5
Myiozetetes similis	7	8		4	2	21
Pachyramphus aglaiae	8	12		6	5	31
Parula pitiayumi			1			1
Parula superciliosa		2				2
Passerculus sandwichensis	45	1				46
Passerina amoena					1	1
Passerina ciris				9	8	17
Passerina versicolor	7	10	1		1	19
Petrochelidon pyrrhonota		3		1		4
Peucedramus taeniatus			6			6
Phainopepla nitens		1	1			2
Pheucticus chrysopeplus		12				12
Pheucticus melanocephalus		6	7	1	1	15
Piaya cayana		1	1			2
Picoides scalaris	2	4		1		7
Picoides stricklandi		3	4			7
Piculus auricularis			2			2
Pipilo chlorurus	2				1	3
Pipilo fuscus	3	4				7
Piranga bidentata		1	2			3
Piranga erythrocephala		1				1
Piranga flava		5	4			9
Piranga ludoviciana	1					1
Piranga rubra			1		3	4
Pitangus sulphuratus	4	6	1	3	4	18
Poecile sclateri		3	4			7
Polioptila melanura		1				1
Polioptila nigriceps	6	6		4	1	17
Progne subis	1	4		3		8
Psaltriparus minimus			15			15
Ptilogonys cinereus		1				1
Pyrocephalus rubinus	3	5		1	1	10
Quiscalus mexicanus	4	7	3			14
Rhodinocichla rosea		1				1
Ridgwayia pinicola			5			5
Saltator coerulescens	4	4		5		13
Sayornis nigricans		2			2	4
Sayornis saya		2				2
Sialia sialis		4	6			10
Sitta carolinensis		1	10			11
Sphyrapicus thyroideus					1	1
Spiza americana	1					1
Spizella passerina		1				1
Sporophila torqueola	3	5				8
Stelgidopteryx serripennis		3			1	4
Tachycineta albilinea	6	1		3		10
Tachycineta bicolor				1		1
Thryothorus felix	2	7	1	1	3	14
Thryothorus sinaloa	1	7			1	9
Toxostoma bendirei		1				1
Toxostoma curvirostre	12	10	4	1	2	29
Turdus assimilis		1	5			6
Turdus migratorius		3	8			11
Turdus rufopalliatus		3			2	5
Tyrannus crassirostris	2	4	2		5	13
Tyrannus melancholicus	11	19	2	5	2	39
Tyrannus verticalis		1			1	2
Tyrannus vociferans	1	4	1	1		7
Vermivora luciae		4		1	3	8
Vireo bellii	2			1	4	7
Vireo flavoviridis	1	17				18
Vireo gilvus	4	3	4		1	12
Vireo huttoni		5	7	1		13
Vireo hypochryseus			1			1
Vireo pallens	2					2
Volatinia jacarina		3	1		4	8
Xiphorhynchus flavigaster		1				1
Zonotrichia leucophrys	1					1
Grand Total	323	569	212	109	102	1315

## Sheet: XYZ_MexBirds_M_MSL.csv
ORDER_	FAMILY	Mesic/Thorn	SPECIES	LATITUDE	LONGITUDE	DAY_	MONTH_	YEAR_	original_s	Elev (m)
PASSERIFORMES	ICTERIDAE	M	Agelaius phoeniceus	25.915	-109.165	10	8	1933	223975	10
CUCULIFORMES	CUCULIDAE	M	Coccyzus americanus	27.9183	-110.898	22	6	1928	76	4
CUCULIFORMES	CUCULIDAE	M	Coccyzus americanus	26.35	-109.133	9	6	1930	217	8
CUCULIFORMES	CUCULIDAE	M	Coccyzus americanus	26.4917	-108.52	14	6	1963	173	140
CUCULIFORMES	CUCULIDAE	M	Crotophaga sulcirostris	24.81	-107.857	20	5	1934	3494	6
CUCULIFORMES	CUCULIDAE	M	Crotophaga sulcirostris	27.225	-109.248	6	6	1931	3555	64
CUCULIFORMES	CUCULIDAE	M	Crotophaga sulcirostris	24.7967	-107.402	15	6	1934	3492	56
CUCULIFORMES	CUCULIDAE	M	Crotophaga sulcirostris	27.15	-109.4	19	6	1937	3567	42
CUCULIFORMES	CUCULIDAE	M	Crotophaga sulcirostris	26.455	-108.552	14	6	1963	3472	135
CUCULIFORMES	CUCULIDAE	M	Crotophaga sulcirostris	26.455	-108.552	16	6	1963	3473	135
CUCULIFORMES	CUCULIDAE	M	Crotophaga sulcirostris	26.455	-108.552	14	6	1963	3474	135
CUCULIFORMES	CUCULIDAE	M	Crotophaga sulcirostris	23.9133	-106.9	6	6	1965	3496	10
CUCULIFORMES	CUCULIDAE	M	Crotophaga sulcirostris	24.4467	-107.113	24	7	1958	3468	70
CUCULIFORMES	CUCULIDAE	M	Crotophaga sulcirostris	24.7967	-107.402	28	7	1964	2943	56
CUCULIFORMES	CUCULIDAE	M	Crotophaga sulcirostris	25.915	-109.165	5	8	1933	3475	10
CUCULIFORMES	CUCULIDAE	M	Crotophaga sulcirostris	25.915	-109.165	9	8	1933	3476	10
CUCULIFORMES	CUCULIDAE	M	Crotophaga sulcirostris	25.915	-109.165	9	8	1933	3477	10
CUCULIFORMES	CUCULIDAE	M	Crotophaga sulcirostris	25.915	-109.165	16	8	1933	3478	10
CUCULIFORMES	CUCULIDAE	M	Crotophaga sulcirostris	25.915	-109.165	8	8	1933	3479	10
CUCULIFORMES	CUCULIDAE	M	Crotophaga sulcirostris	25.915	-109.165	25	8	1933	3480	10
CUCULIFORMES	CUCULIDAE	M	Crotophaga sulcirostris	25.915	-109.165	3	8	1933	3482	10
CUCULIFORMES	CUCULIDAE	M	Crotophaga sulcirostris	25.915	-109.165	14	8	1933	3483	10
CUCULIFORMES	CUCULIDAE	M	Crotophaga sulcirostris	25.915	-109.165	8	9	1933	3481	10
CUCULIFORMES	CUCULIDAE	M	Crotophaga sulcirostris	25.46	-108.078	28	9	1933	3508	51
CUCULIFORMES	CUCULIDAE	M	Crotophaga sulcirostris	25.46	-108.078	19	9	1933	3509	51
CUCULIFORMES	CUCULIDAE	M	Crotophaga sulcirostris	27.6067	-109.935	24	9	1954	3552	37
PASSERIFORMES	PARULIDAE	M	Icteria virens	27.075	-109.577	4	5	1888	163309	23
PASSERIFORMES	PARULIDAE	M	Icteria virens	26.65	-108.467	29	5	1888	163314	189
PASSERIFORMES	PARULIDAE	M	Icteria virens	26.65	-108.467	29	5	1888	163321	189
PASSERIFORMES	PARULIDAE	M	Icteria virens	24.81	-107.857	26	5	1934	163839	6
PASSERIFORMES	PARULIDAE	M	Icteria virens	27.31	-109.3	4	5	1945	163909	106
PASSERIFORMES	PARULIDAE	M	Icteria virens	27.9183	-110.898	9	6	1930	163904	4
PASSERIFORMES	PARULIDAE	M	Icteria virens	27.225	-109.248	3	6	1931	163899	64
PASSERIFORMES	PARULIDAE	M	Icteria virens	27.225	-109.248	3	6	1931	163900	64
PASSERIFORMES	PARULIDAE	M	Icteria virens	27.5817	-110.007	7	6	1933	163927	27
PASSERIFORMES	PARULIDAE	M	Icteria virens	24.7967	-107.402	15	6	1934	163838	56
PASSERIFORMES	PARULIDAE	M	Icteria virens	27.15	-109.4	19	6	1937	163931	42
PASSERIFORMES	PARULIDAE	M	Icteria virens	27.15	-109.4	19	6	1937	163932	42
PASSERIFORMES	PARULIDAE	M	Icteria virens	27.5483	-109.95	2	6	1954	163893	33
PASSERIFORMES	PARULIDAE	M	Icteria virens	26.455	-108.552	14	6	1963	163823	135
PASSERIFORMES	PARULIDAE	M	Icteria virens	26.455	-108.552	13	6	1963	163824	135
PASSERIFORMES	PARULIDAE	M	Icteria virens	25.915	-109.165	26	8	1933	163825	10
PASSERIFORMES	PARULIDAE	M	Icteria virens	25.915	-109.165	3	8	1933	163827	10
PASSERIFORMES	PARULIDAE	M	Icteria virens	27.62	-109.927	21	8	1968	163925	36
PASSERIFORMES	PARULIDAE	M	Icteria virens	27.62	-109.927	21	8	1968	164121	36
PASSERIFORMES	PARULIDAE	M	Icteria virens	25.915	-109.165	12	9	1933	163826	10
PASSERIFORMES	PARULIDAE	M	Icteria virens	27.66	-109.945	22	9	1954	163926	31
PASSERIFORMES	PARULIDAE	M	Icteria virens	27.4967	-109.937	18	9	1954	163901	35
PASSERIFORMES	ICTERIDAE	M	Icterus spurius	27.155	-109.442	9	6	1957	232870	79
PASSERIFORMES	ICTERIDAE	M	Icterus spurius	27.155	-109.442	9	6	1957	232871	79
PASSERIFORMES	ICTERIDAE	M	Icterus spurius	27.6067	-109.935	28	6	1959	232868	37
PASSERIFORMES	ICTERIDAE	M	Icterus spurius	26.455	-108.552	13	6	1963	232829	135
PASSERIFORMES	ICTERIDAE	M	Icterus spurius	27.62	-109.927	21	8	1968	232873	36
PASSERIFORMES	ICTERIDAE	M	Icterus spurius	27.6067	-109.935	27	9	1954	232869	37
PASSERIFORMES	ICTERIDAE	M	Icterus spurius	27.6067	-109.935	24	9	1954	232874	37
PASSERIFORMES	ICTERIDAE	M	Icterus spurius	27.6067	-109.935	24	9	1954	232875	37
PASSERIFORMES	EMBERIZIDAE	M	Melospiza melodia	27.5817	-110.007	9	6	1933	205306	27
PASSERIFORMES	EMBERIZIDAE	M	Melospiza melodia	27.6217	-109.928	28	6	1959	205307	35
PASSERIFORMES	EMBERIZIDAE	M	Melospiza melodia	27.585	-109.847	14	9	1952	205270	69
PASSERIFORMES	MIMIDAE	M	Mimus polyglottos	25.915	-109.165	4	8	1933	129967	10
PASSERIFORMES	HIRUNDINIDAE	M	Petrochelidon pyrrhonota	24.7967	-107.402	5	6	1934	87960	56
PASSERIFORMES	HIRUNDINIDAE	M	Petrochelidon pyrrhonota	24.7967	-107.402	10	6	1934	87961	56
PASSERIFORMES	HIRUNDINIDAE	M	Petrochelidon pyrrhonota	24.7967	-107.402	10	6	1934	87962	56
PASSERIFORMES	HIRUNDINIDAE	M	Petrochelidon pyrrhonota	25.6	-109.048	7	8	1967	87963	23
PASSERIFORMES	ICTERIDAE	M	Quiscalus mexicanus	27.075	-109.577	5	5	1888	227709	23
PASSERIFORMES	ICTERIDAE	M	Quiscalus mexicanus	24.86	-108.1	12	5	1913	228440	3
PASSERIFORMES	ICTERIDAE	M	Quiscalus mexicanus	25.08	-108.053	4	5	1934	228460	7
PASSERIFORMES	ICTERIDAE	M	Quiscalus mexicanus	26.35	-109.133	19	5	1937	228554	8
PASSERIFORMES	ICTERIDAE	M	Quiscalus mexicanus	25.1033	-108.033	1	6	1904	228441	9
PASSERIFORMES	ICTERIDAE	M	Quiscalus mexicanus	25.1033	-108.033	1	6	1904	228442	9
PASSERIFORMES	ICTERIDAE	M	Quiscalus mexicanus	27.9183	-110.898	24	6	1928	227677	4
PASSERIFORMES	ICTERIDAE	M	Quiscalus mexicanus	27.9183	-110.898	15	6	1928	227678	4
PASSERIFORMES	ICTERIDAE	M	Quiscalus mexicanus	27.225	-109.248	5	6	1931	228566	64
PASSERIFORMES	ICTERIDAE	M	Quiscalus mexicanus	25.905	-109.105	5	6	1954	228378	10
PASSERIFORMES	ICTERIDAE	M	Quiscalus mexicanus	27.5483	-109.95	2	6	1954	228553	33
PASSERIFORMES	ICTERIDAE	M	Quiscalus mexicanus	27.595	-109.922	15	7	1963	227672	37
PASSERIFORMES	ICTERIDAE	M	Quiscalus mexicanus	27.595	-109.922	15	7	1963	227674	37
PASSERIFORMES	ICTERIDAE	M	Quiscalus mexicanus	27.595	-109.922	15	7	1963	227675	37
PASSERIFORMES	HIRUNDINIDAE	M	Stelgidopteryx serripennis	27.225	-109.248	7	6	1931	87091	64
PASSERIFORMES	HIRUNDINIDAE	M	Stelgidopteryx serripennis	27.225	-109.248	7	6	1931	87092	64
PASSERIFORMES	HIRUNDINIDAE	M	Stelgidopteryx serripennis	27.5483	-109.95	3	6	1954	87083	33
PASSERIFORMES	HIRUNDINIDAE	M	Stelgidopteryx serripennis	27.6067	-109.935	27	9	1954	87084	37
PASSERIFORMES	TYRANNIDAE	M	Tyrannus melancholicus	27.075	-109.577	5	5	1888	58990	23
PASSERIFORMES	TYRANNIDAE	M	Tyrannus melancholicus	26.08	-108.758	21	5	1925	59755	40
PASSERIFORMES	TYRANNIDAE	M	Tyrannus melancholicus	26.415	-108.622	13	5	1933	59732	78
PASSERIFORMES	TYRANNIDAE	M	Tyrannus melancholicus	24.81	-107.857	16	5	1934	59733	6
PASSERIFORMES	TYRANNIDAE	M	Tyrannus melancholicus	24.81	-107.857	17	5	1934	59734	6
PASSERIFORMES	TYRANNIDAE	M	Tyrannus melancholicus	24.81	-107.857	18	5	1934	59735	6
PASSERIFORMES	TYRANNIDAE	M	Tyrannus melancholicus	24.81	-107.857	15	5	1934	59736	6
PASSERIFORMES	TYRANNIDAE	M	Tyrannus melancholicus	24.81	-107.857	15	5	1934	59737	6
PASSERIFORMES	TYRANNIDAE	M	Tyrannus melancholicus	26.35	-109.133	19	5	1937	59781	8
PASSERIFORMES	TYRANNIDAE	M	Tyrannus melancholicus	26.35	-109.133	18	5	1937	59782	8
PASSERIFORMES	TYRANNIDAE	M	Tyrannus melancholicus	26.35	-109.133	2	5	1947	59783	8
PASSERIFORMES	TYRANNIDAE	M	Tyrannus melancholicus	27.9183	-110.898	15	6	1928	58953	4
PASSERIFORMES	TYRANNIDAE	M	Tyrannus melancholicus	27.9183	-110.898	22	6	1928	58954	4
PASSERIFORMES	TYRANNIDAE	M	Tyrannus melancholicus	27.9183	-110.898	22	6	1928	58955	4
PASSERIFORMES	TYRANNIDAE	M	Tyrannus melancholicus	27.9183	-110.898	23	6	1928	58956	4
PASSERIFORMES	TYRANNIDAE	M	Tyrannus melancholicus	27.9183	-110.898	23	6	1928	58957	4
PASSERIFORMES	TYRANNIDAE	M	Tyrannus melancholicus	26.35	-109.133	9	6	1930	59779	8
PASSERIFORMES	TYRANNIDAE	M	Tyrannus melancholicus	26.35	-109.133	9	6	1930	59780	8
PASSERIFORMES	TYRANNIDAE	M	Tyrannus melancholicus	27.225	-109.248	5	6	1931	59788	64
PASSERIFORMES	TYRANNIDAE	M	Tyrannus melancholicus	27.585	-110.005	7	6	1933	59813	29
PASSERIFORMES	TYRANNIDAE	M	Tyrannus melancholicus	24.7967	-107.402	14	6	1934	59730	56
PASSERIFORMES	TYRANNIDAE	M	Tyrannus melancholicus	24.7967	-107.402	1	6	1934	59731	56
PASSERIFORMES	TYRANNIDAE	M	Tyrannus melancholicus	25.9533	-109.052	20	6	1955	59700	54
PASSERIFORMES	TYRANNIDAE	M	Tyrannus melancholicus	25.9533	-109.052	20	6	1955	59701	54
PASSERIFORMES	TYRANNIDAE	M	Tyrannus melancholicus	26.455	-108.552	12	6	1963	59705	135
PASSERIFORMES	TYRANNIDAE	M	Tyrannus melancholicus	26.455	-108.552	15	6	1963	59706	135
PASSERIFORMES	TYRANNIDAE	M	Tyrannus melancholicus	26.455	-108.552	14	6	1963	59707	135
PASSERIFORMES	TYRANNIDAE	M	Tyrannus melancholicus	26.455	-108.552	13	6	1963	59708	135
PASSERIFORMES	TYRANNIDAE	M	Tyrannus melancholicus	26.455	-108.552	12	6	1963	59709	135
PASSERIFORMES	TYRANNIDAE	M	Tyrannus melancholicus	26.455	-108.552	12	6	1963	59710	135
PASSERIFORMES	TYRANNIDAE	M	Tyrannus melancholicus	27.595	-109.922	15	7	1963	58972	37
PASSERIFORMES	TYRANNIDAE	M	Tyrannus melancholicus	27.595	-109.922	15	7	1963	58973	37
PASSERIFORMES	TYRANNIDAE	M	Tyrannus melancholicus	25.915	-109.165	17	8	1933	59715	10
PASSERIFORMES	TYRANNIDAE	M	Tyrannus melancholicus	25.915	-109.165	26	8	1933	59716	10
PASSERIFORMES	TYRANNIDAE	M	Tyrannus melancholicus	27.62	-109.927	19	8	1968	59965	36
PASSERIFORMES	TYRANNIDAE	M	Tyrannus melancholicus	27.6067	-109.935	21	8	1968	60101	37
PASSERIFORMES	TYRANNIDAE	M	Tyrannus melancholicus	25.16	-107.697	18	8	1968	59713	140
PASSERIFORMES	TYRANNIDAE	M	Tyrannus melancholicus	25.46	-108.078	20	9	1933	59743	51
PASSERIFORMES	TYRANNIDAE	M	Tyrannus melancholicus	27.6067	-109.935	24	9	1954	60100	37
PASSERIFORMES	PARULIDAE	M	Vermivora luciae	27.6067	-109.935	28	6	1959	140418	37
PASSERIFORMES	PARULIDAE	M	Vermivora luciae	26.455	-108.552	16	6	1963	140369	135
PASSERIFORMES	PARULIDAE	M	Vermivora luciae	26.455	-108.552	13	6	1963	140370	135
PASSERIFORMES	PARULIDAE	M	Vermivora luciae	26.455	-108.552	12	6	1963	140371	135
PASSERIFORMES	PARULIDAE	M	Vermivora luciae	27.6217	-109.928	21	8	1968	140413	35
PASSERIFORMES	PARULIDAE	M	Vermivora luciae	27.6067	-109.935	23	9	1954	140376	37
PASSERIFORMES	PARULIDAE	M	Vermivora luciae	27.6067	-109.935	25	9	1954	140377	37
PASSERIFORMES	PARULIDAE	M	Vermivora luciae	27.6067	-109.935	28	9	1954	140378	37
PASSERIFORMES	VIREONIDAE	M	Vireo bellii	27.075	-109.577	5	5	1888	69192	23
PASSERIFORMES	VIREONIDAE	M	Vireo bellii	26.415	-108.622	16	5	1933	69558	78
PASSERIFORMES	VIREONIDAE	M	Vireo bellii	25.915	-109.165	3	8	1933	69545	10
PASSERIFORMES	VIREONIDAE	M	Vireo bellii	25.915	-109.165	1	9	1933	69546	10
PASSERIFORMES	VIREONIDAE	M	Vireo bellii	27.6067	-109.935	23	9	1954	69596	37
PASSERIFORMES	VIREONIDAE	M	Vireo bellii	27.6067	-109.935	21	9	1954	69597	37
PASSERIFORMES	VIREONIDAE	M	Vireo bellii	27.6067	-109.935	28	9	1954	69599	37
PASSERIFORMES	EMBERIZIDAE	M	Volatinia jacarina	25.1033	-108.033	2	6	1904	178708	9
PASSERIFORMES	EMBERIZIDAE	M	Volatinia jacarina	24.7967	-107.402	5	6	1934	178685	56
PASSERIFORMES	EMBERIZIDAE	M	Volatinia jacarina	24.7967	-107.402	17	6	1934	178686	56
PASSERIFORMES	EMBERIZIDAE	M	Volatinia jacarina	25.1167	-108.007	99	7	1875	178001	16
PASSERIFORMES	EMBERIZIDAE	M	Volatinia jacarina	25.46	-108.078	25	9	1933	178700	51
PASSERIFORMES	EMBERIZIDAE	M	Volatinia jacarina	25.46	-108.078	28	9	1933	178701	51
PASSERIFORMES	EMBERIZIDAE	M	Volatinia jacarina	25.46	-108.078	25	9	1933	178703	51
PASSERIFORMES	EMBERIZIDAE	M	Volatinia jacarina	25.46	-108.078	22	9	1933	178941	51
PASSERIFORMES	PARULIDAE	M-C	Geothlypis trichas	27.09	-109.918	1	5	1930	152900	5
PASSERIFORMES	PARULIDAE	M-C	Geothlypis trichas	27.09	-109.918	28	5	1930	153216	5
PASSERIFORMES	PARULIDAE	M-C	Geothlypis trichas	27.8989	-110.588	12	5	1930	152914	90
PASSERIFORMES	PARULIDAE	M-C	Geothlypis trichas	24.81	-107.857	25	5	1934	152798	6
PASSERIFORMES	PARULIDAE	M-C	Geothlypis trichas	25.87	-109.41	10	5	1947	153215	2
PASSERIFORMES	PARULIDAE	M-C	Geothlypis trichas	26.35	-109.133	1	5	1947	152888	8
PASSERIFORMES	PARULIDAE	M-C	Geothlypis trichas	26.3667	-109.143	8	6	1930	153219	7
PASSERIFORMES	PARULIDAE	M-C	Geothlypis trichas	27.15	-109.4	22	6	1937	152936	42
PASSERIFORMES	PARULIDAE	M-C	Geothlypis trichas	27.15	-109.4	22	6	1937	152937	42
PASSERIFORMES	PARULIDAE	M-C	Geothlypis trichas	27.15	-109.4	22	6	1937	152939	42
PASSERIFORMES	PARULIDAE	M-C	Geothlypis trichas	27.15	-109.4	22	6	1937	152941	42
PASSERIFORMES	PARULIDAE	M-C	Geothlypis trichas	27.15	-109.4	22	6	1937	152942	42
PASSERIFORMES	PARULIDAE	M-C	Geothlypis trichas	27.15	-109.4	22	6	1937	152943	42
PASSERIFORMES	PARULIDAE	M-C	Geothlypis trichas	27.6067	-109.935	28	9	1954	152886	37
PASSERIFORMES	ICTERIDAE	M-T	Cacicus melanicterus	25.1033	-108.033	8	6	1904	240417	9
PASSERIFORMES	ICTERIDAE	M-T	Cacicus melanicterus	25.1033	-108.033	1	6	1904	240951	9
PASSERIFORMES	ICTERIDAE	M-T	Cacicus melanicterus	25.1033	-108.033	2	6	1904	240952	9
PASSERIFORMES	ICTERIDAE	M-T	Cacicus melanicterus	25.1033	-108.033	1	6	1904	240953	9
PASSERIFORMES	ICTERIDAE	M-T	Cacicus melanicterus	25.1033	-108.033	1	6	1904	240954	9
PASSERIFORMES	ICTERIDAE	M-T	Cacicus melanicterus	25.1033	-108.033	1	6	1904	240955	9
PASSERIFORMES	ICTERIDAE	M-T	Cacicus melanicterus	25.1033	-108.033	6	6	1904	240956	9
PASSERIFORMES	ICTERIDAE	M-T	Cacicus melanicterus	25.1033	-108.033	2	6	1904	240957	9
PASSERIFORMES	ICTERIDAE	M-T	Cacicus melanicterus	25.1033	-108.033	2	6	1904	240958	9
PASSERIFORMES	ICTERIDAE	M-T	Cacicus melanicterus	25.1033	-108.033	2	6	1904	240959	9
PASSERIFORMES	ICTERIDAE	M-T	Cacicus melanicterus	25.1033	-108.033	2	6	1904	240960	9
PASSERIFORMES	ICTERIDAE	M-T	Cacicus melanicterus	25.1033	-108.033	3	6	1904	240961	9
PASSERIFORMES	ICTERIDAE	M-T	Cacicus melanicterus	25.1033	-108.033	1	6	1904	240962	9
PASSERIFORMES	ICTERIDAE	M-T	Cacicus melanicterus	25.1033	-108.033	3	6	1904	240963	9
PASSERIFORMES	ICTERIDAE	M-T	Cacicus melanicterus	25.1033	-108.033	1	6	1904	240964	9
PASSERIFORMES	ICTERIDAE	M-T	Cacicus melanicterus	25.1033	-108.033	1	6	1904	240965	9
PASSERIFORMES	ICTERIDAE	M-T	Cacicus melanicterus	25.1033	-108.033	8	6	1904	240967	9
PASSERIFORMES	ICTERIDAE	M-T	Cacicus melanicterus	25.1033	-108.033	99	6	1904	240968	9
PASSERIFORMES	ICTERIDAE	M-T	Cacicus melanicterus	25.1033	-108.033	9	6	1904	240969	9
PASSERIFORMES	ICTERIDAE	M-T	Cacicus melanicterus	25.1033	-108.033	9	6	1904	240970	9
PASSERIFORMES	ICTERIDAE	M-T	Cacicus melanicterus	25.1033	-108.033	2	6	1904	240971	9
PASSERIFORMES	ICTERIDAE	M-T	Cacicus melanicterus	25.1033	-108.033	8	6	1904	240972	9
PASSERIFORMES	ICTERIDAE	M-T	Cacicus melanicterus	25.1033	-108.033	1	6	1904	240973	9
PASSERIFORMES	ICTERIDAE	M-T	Cacicus melanicterus	25.1033	-108.033	5	6	1904	240974	9
PASSERIFORMES	ICTERIDAE	M-T	Cacicus melanicterus	25.1033	-108.033	3	6	1904	240975	9
PASSERIFORMES	ICTERIDAE	M-T	Cacicus melanicterus	25.1033	-108.033	5	6	1904	240976	9
PASSERIFORMES	ICTERIDAE	M-T	Cacicus melanicterus	25.1033	-108.033	5	6	1904	240977	9
PASSERIFORMES	CORVIDAE	M-T	Calocitta colliei	25.08	-108.053	7	5	1934	76771	7
PASSERIFORMES	CORVIDAE	M-T	Calocitta colliei	23.83	-106.66	21	6	1955	76765	26
PASSERIFORMES	CORVIDAE	M-T	Calocitta colliei	24.9917	-107.395	21	6	1955	76681	80
PASSERIFORMES	CORVIDAE	M-T	Calocitta colliei	24.9917	-107.395	21	6	1955	76682	80
PASSERIFORMES	CORVIDAE	M-T	Calocitta colliei	24.9917	-107.395	21	6	1955	76683	80
PASSERIFORMES	CORVIDAE	M-T	Calocitta colliei	26.4233	-108.595	13	6	1963	76687	91
PASSERIFORMES	CORVIDAE	M-T	Calocitta colliei	23.9133	-106.9	6	6	1965	76723	10
PASSERIFORMES	CORVIDAE	M-T	Corvus sinaloae	27.585	-109.847	7	5	1888	84027	69
PASSERIFORMES	CORVIDAE	M-T	Corvus sinaloae	27.585	-109.847	7	5	1888	84028	69
PASSERIFORMES	CORVIDAE	M-T	Corvus sinaloae	26.35	-109.133	17	5	1937	84154	8
PASSERIFORMES	CORVIDAE	M-T	Corvus sinaloae	26.35	-109.133	17	5	1937	84155	8
PASSERIFORMES	CORVIDAE	M-T	Corvus sinaloae	26.35	-109.133	16	5	1937	84159	8
PASSERIFORMES	CORVIDAE	M-T	Corvus sinaloae	26.35	-109.133	17	5	1937	84160	8
PASSERIFORMES	CORVIDAE	M-T	Corvus sinaloae	24.6317	-107.93	7	5	1962	84090	3
PASSERIFORMES	CORVIDAE	M-T	Corvus sinaloae	24.7217	-107.728	8	5	1962	84092	10
PASSERIFORMES	CORVIDAE	M-T	Corvus sinaloae	25.1033	-108.033	1	6	1904	84140	9
PASSERIFORMES	CORVIDAE	M-T	Corvus sinaloae	25.1033	-108.033	1	6	1904	84141	9
PASSERIFORMES	CORVIDAE	M-T	Corvus sinaloae	26.35	-109.133	8	6	1930	84156	8
PASSERIFORMES	CORVIDAE	M-T	Corvus sinaloae	26.35	-109.133	9	6	1930	84157	8
PASSERIFORMES	CORVIDAE	M-T	Corvus sinaloae	24.9917	-107.395	21	6	1955	84091	80
PASSERIFORMES	CORVIDAE	M-T	Corvus sinaloae	26.455	-108.552	16	6	1963	84096	135
PASSERIFORMES	CORVIDAE	M-T	Corvus sinaloae	26.455	-108.552	15	6	1963	84097	135
PASSERIFORMES	CORVIDAE	M-T	Corvus sinaloae	26.455	-108.552	15	6	1963	84098	135
PASSERIFORMES	CORVIDAE	M-T	Corvus sinaloae	26.455	-108.552	12	6	1963	84099	135
PASSERIFORMES	CORVIDAE	M-T	Corvus sinaloae	26.455	-108.552	15	6	1963	84100	135
PASSERIFORMES	CORVIDAE	M-T	Corvus sinaloae	26.08	-108.758	17	7	1963	84024	40
PASSERIFORMES	CORVIDAE	M-T	Corvus sinaloae	25.915	-109.165	11	8	1933	84104	10
PASSERIFORMES	CORVIDAE	M-T	Corvus sinaloae	25.915	-109.165	26	8	1933	84105	10
PASSERIFORMES	CORVIDAE	M-T	Corvus sinaloae	26.7733	-109.325	25	8	1963	84023	43
PASSERIFORMES	CORVIDAE	M-T	Corvus sinaloae	26.7733	-109.325	25	8	1963	84025	43
PASSERIFORMES	CORVIDAE	M-T	Corvus sinaloae	25.915	-109.165	2	9	1933	84106	10
PASSERIFORMES	TYRANNIDAE	M-T	Myiodynastes luteiventris	24.7967	-107.402	3	6	1934	58425	56
PASSERIFORMES	TYRANNIDAE	M-T	Myiodynastes luteiventris	24.7967	-107.402	4	6	1934	58426	56
PASSERIFORMES	TYRANNIDAE	M-T	Myiodynastes luteiventris	24.7967	-107.402	1	6	1934	58427	56
PASSERIFORMES	TYRANNIDAE	M-T	Myiodynastes luteiventris	24.7967	-107.402	10	6	1934	58428	56
PASSERIFORMES	TYRANNIDAE	M-T	Myiodynastes luteiventris	26.455	-108.552	16	6	1963	58415	135
PASSERIFORMES	TYRANNIDAE	M-T	Myiozetetes similis	26.08	-108.758	21	5	1925	57368	40
PASSERIFORMES	TYRANNIDAE	M-T	Myiozetetes similis	26.08	-108.758	21	5	1925	57369	40
PASSERIFORMES	TYRANNIDAE	M-T	Myiozetetes similis	26.415	-108.622	11	5	1933	57340	78
PASSERIFORMES	TYRANNIDAE	M-T	Myiozetetes similis	26.415	-108.622	11	5	1933	57341	78
PASSERIFORMES	TYRANNIDAE	M-T	Myiozetetes similis	26.415	-108.622	13	5	1933	57342	78
PASSERIFORMES	TYRANNIDAE	M-T	Myiozetetes similis	26.415	-108.622	13	5	1933	57343	78
PASSERIFORMES	TYRANNIDAE	M-T	Myiozetetes similis	24.81	-107.857	17	5	1934	57346	6
PASSERIFORMES	TYRANNIDAE	M-T	Myiozetetes similis	24.7967	-107.402	14	6	1934	57335	56
PASSERIFORMES	TYRANNIDAE	M-T	Myiozetetes similis	24.7967	-107.402	2	6	1934	57338	56
PASSERIFORMES	TYRANNIDAE	M-T	Myiozetetes similis	27.15	-109.4	23	6	1937	57423	42
PASSERIFORMES	TYRANNIDAE	M-T	Myiozetetes similis	27.15	-109.4	23	6	1937	57424	42
PASSERIFORMES	TYRANNIDAE	M-T	Myiozetetes similis	27.15	-109.4	19	6	1937	57438	42
PASSERIFORMES	TYRANNIDAE	M-T	Myiozetetes similis	27.5483	-109.95	2	6	1954	57407	33
PASSERIFORMES	TYRANNIDAE	M-T	Myiozetetes similis	25.9533	-109.035	20	6	1955	57316	8
PASSERIFORMES	TYRANNIDAE	M-T	Myiozetetes similis	25.9533	-109.052	20	6	1955	57315	54
PASSERIFORMES	TYRANNIDAE	M-T	Myiozetetes similis	25.915	-109.165	10	8	1933	57324	10
PASSERIFORMES	TYRANNIDAE	M-T	Myiozetetes similis	25.915	-109.165	7	8	1933	57325	10
PASSERIFORMES	TYRANNIDAE	M-T	Myiozetetes similis	25.915	-109.165	3	8	1933	57326	10
PASSERIFORMES	TYRANNIDAE	M-T	Myiozetetes similis	25.915	-109.165	25	8	1933	57327	10
PASSERIFORMES	TYRANNIDAE	M-T	Myiozetetes similis	27.6067	-109.935	28	9	1954	57415	37
PASSERIFORMES	TYRANNIDAE	M-T	Myiozetetes similis	27.6067	-109.935	25	9	1954	57416	37
PASSERIFORMES	TYRANNIDAE	M-T	Pachyramphus aglaiae	24.81	-107.857	20	5	1934	64653	6
PASSERIFORMES	TYRANNIDAE	M-T	Pachyramphus aglaiae	24.81	-107.857	27	5	1934	64655	6
PASSERIFORMES	TYRANNIDAE	M-T	Pachyramphus aglaiae	24.81	-107.857	15	5	1934	64657	6
PASSERIFORMES	TYRANNIDAE	M-T	Pachyramphus aglaiae	24.81	-107.857	17	5	1934	64658	6
PASSERIFORMES	TYRANNIDAE	M-T	Pachyramphus aglaiae	24.81	-107.857	20	5	1934	64668	6
PASSERIFORMES	TYRANNIDAE	M-T	Pachyramphus aglaiae	24.81	-107.857	27	5	1934	64669	6
PASSERIFORMES	TYRANNIDAE	M-T	Pachyramphus aglaiae	24.81	-107.857	17	5	1934	64670	6
PASSERIFORMES	TYRANNIDAE	M-T	Pachyramphus aglaiae	24.81	-107.857	15	5	1934	64671	6
PASSERIFORMES	TYRANNIDAE	M-T	Pachyramphus aglaiae	25.8067	-108.488	1	6	1934	64692	49
PASSERIFORMES	TYRANNIDAE	M-T	Pachyramphus aglaiae	25.8067	-108.488	1	6	1934	64693	49
PASSERIFORMES	TYRANNIDAE	M-T	Pachyramphus aglaiae	24.7967	-107.402	1	6	1934	64630	56
PASSERIFORMES	TYRANNIDAE	M-T	Pachyramphus aglaiae	24.7967	-107.402	1	6	1934	64633	56
PASSERIFORMES	TYRANNIDAE	M-T	Pachyramphus aglaiae	24.7967	-107.402	1	6	1934	64641	56
PASSERIFORMES	TYRANNIDAE	M-T	Pachyramphus aglaiae	24.7967	-107.402	1	6	1934	64642	56
PASSERIFORMES	TYRANNIDAE	M-T	Pachyramphus aglaiae	25.9533	-109.035	20	6	1955	64584	8
PASSERIFORMES	TYRANNIDAE	M-T	Pachyramphus aglaiae	25.9533	-109.035	20	6	1955	64585	8
PASSERIFORMES	TYRANNIDAE	M-T	Pachyramphus aglaiae	26.455	-108.552	15	6	1963	64590	135
PASSERIFORMES	TYRANNIDAE	M-T	Pachyramphus aglaiae	26.455	-108.552	15	6	1963	64591	135
PASSERIFORMES	TYRANNIDAE	M-T	Pachyramphus aglaiae	26.455	-108.552	15	6	1963	64592	135
PASSERIFORMES	TYRANNIDAE	M-T	Pachyramphus aglaiae	26.455	-108.552	16	6	1963	64593	135
PASSERIFORMES	TYRANNIDAE	M-T	Pachyramphus aglaiae	25.915	-109.165	3	8	1933	64597	10
PASSERIFORMES	TYRANNIDAE	M-T	Pachyramphus aglaiae	25.915	-109.165	6	8	1933	64598	10
PASSERIFORMES	TYRANNIDAE	M-T	Pachyramphus aglaiae	25.915	-109.165	3	8	1933	64600	10
PASSERIFORMES	TYRANNIDAE	M-T	Pachyramphus aglaiae	25.915	-109.165	6	8	1933	64602	10
PASSERIFORMES	TYRANNIDAE	M-T	Pachyramphus aglaiae	25.915	-109.165	6	8	1933	64603	10
PASSERIFORMES	TYRANNIDAE	M-T	Pachyramphus aglaiae	27.66	-109.945	21	8	1968	64899	31
PASSERIFORMES	TYRANNIDAE	M-T	Pachyramphus aglaiae	25.915	-109.165	12	9	1933	64599	10
PASSERIFORMES	TYRANNIDAE	M-T	Pachyramphus aglaiae	25.915	-109.165	12	9	1933	64601	10
PASSERIFORMES	TYRANNIDAE	M-T	Pachyramphus aglaiae	27.6067	-109.935	20	9	1954	64761	37
PASSERIFORMES	TYRANNIDAE	M-T	Pachyramphus aglaiae	27.6067	-109.935	20	9	1954	64762	37
PASSERIFORMES	TYRANNIDAE	M-T	Pachyramphus aglaiae	27.6067	-109.935	22	9	1954	64848	37
PASSERIFORMES	TYRANNIDAE	M-T	Pitangus sulphuratus	26.415	-108.622	11	5	1933	55708	78
PASSERIFORMES	TYRANNIDAE	M-T	Pitangus sulphuratus	24.81	-107.857	16	5	1934	55710	6
PASSERIFORMES	TYRANNIDAE	M-T	Pitangus sulphuratus	24.81	-107.857	19	5	1934	55712	6
PASSERIFORMES	TYRANNIDAE	M-T	Pitangus sulphuratus	26.35	-109.133	17	5	1937	55788	8
PASSERIFORMES	TYRANNIDAE	M-T	Pitangus sulphuratus	26.35	-109.133	9	6	1930	55786	8
PASSERIFORMES	TYRANNIDAE	M-T	Pitangus sulphuratus	26.35	-109.133	9	6	1930	55787	8
PASSERIFORMES	TYRANNIDAE	M-T	Pitangus sulphuratus	27.15	-109.4	20	6	1937	55794	42
PASSERIFORMES	TYRANNIDAE	M-T	Pitangus sulphuratus	27.15	-109.4	20	6	1937	55795	42
PASSERIFORMES	TYRANNIDAE	M-T	Pitangus sulphuratus	26.455	-108.552	12	6	1963	55695	135
PASSERIFORMES	TYRANNIDAE	M-T	Pitangus sulphuratus	26.455	-108.552	12	6	1963	55696	135
PASSERIFORMES	TYRANNIDAE	M-T	Pitangus sulphuratus	25.525	-108.453	25	7	1976	55692	12
PASSERIFORMES	TYRANNIDAE	M-T	Pitangus sulphuratus	25.915	-109.165	4	8	1933	55700	10
PASSERIFORMES	TYRANNIDAE	M-T	Pitangus sulphuratus	25.915	-109.165	26	8	1933	55701	10
PASSERIFORMES	TYRANNIDAE	M-T	Pitangus sulphuratus	25.915	-109.165	5	8	1933	55702	10
PASSERIFORMES	TYRANNIDAE	M-T	Pitangus sulphuratus	25.46	-108.078	27	9	1933	55733	51
PASSERIFORMES	TYRANNIDAE	M-T	Pitangus sulphuratus	25.46	-108.078	18	9	1933	55734	51
PASSERIFORMES	TYRANNIDAE	M-T	Pitangus sulphuratus	25.46	-108.078	25	9	1933	55735	51
PASSERIFORMES	TYRANNIDAE	M-T	Pitangus sulphuratus	27.6067	-109.935	20	9	1954	55784	37
PASSERIFORMES	CARDINALIDAE	M-T	Saltator coerulescens	26.08	-108.758	23	5	1925	209889	40
PASSERIFORMES	CARDINALIDAE	M-T	Saltator coerulescens	24.81	-107.857	15	5	1934	209861	6
PASSERIFORMES	CARDINALIDAE	M-T	Saltator coerulescens	24.81	-107.857	21	5	1934	209866	6
PASSERIFORMES	CARDINALIDAE	M-T	Saltator coerulescens	24.81	-107.857	17	5	1934	209900	6
PASSERIFORMES	CARDINALIDAE	M-T	Saltator coerulescens	25.1033	-108.033	2	6	1904	209875	9
PASSERIFORMES	CARDINALIDAE	M-T	Saltator coerulescens	24.7967	-107.402	13	6	1934	209855	56
PASSERIFORMES	CARDINALIDAE	M-T	Saltator coerulescens	24.7967	-107.402	15	6	1934	209857	56
PASSERIFORMES	CARDINALIDAE	M-T	Saltator coerulescens	25.9533	-109.035	20	6	1955	209836	8
PASSERIFORMES	CARDINALIDAE	M-T	Saltator coerulescens	25.915	-109.165	5	8	1933	209842	10
PASSERIFORMES	CARDINALIDAE	M-T	Saltator coerulescens	25.915	-109.165	5	8	1933	209843	10
PASSERIFORMES	CARDINALIDAE	M-T	Saltator coerulescens	25.915	-109.165	10	8	1933	209844	10
PASSERIFORMES	CARDINALIDAE	M-T	Saltator coerulescens	25.915	-109.165	19	8	1933	209845	10
PASSERIFORMES	CARDINALIDAE	M-T	Saltator coerulescens	25.915	-109.165	22	8	1933	209846	10
PASSERIFORMES	TROGLODYTIDAE	M-T	Thryothorus felix	24.81	-107.857	26	5	1934	104078	6
PASSERIFORMES	TROGLODYTIDAE	M-T	Thryothorus felix	24.81	-107.857	26	5	1934	104079	6
PASSERIFORMES	TROGLODYTIDAE	M-T	Thryothorus felix	25.1033	-108.033	1	6	1904	104084	9
PASSERIFORMES	TROGLODYTIDAE	M-T	Thryothorus felix	27.15	-109.4	20	6	1937	104107	42
PASSERIFORMES	TROGLODYTIDAE	M-T	Thryothorus felix	27.15	-109.4	20	6	1937	104108	42
PASSERIFORMES	TROGLODYTIDAE	M-T	Thryothorus felix	25.9533	-109.035	20	6	1955	104066	8
PASSERIFORMES	TROGLODYTIDAE	M-T	Thryothorus felix	26.7017	-108.878	9	6	1958	104101	160
PASSERIFORMES	TROGLODYTIDAE	M-T	Thryothorus felix	26.455	-108.552	13	6	1963	104067	135
PASSERIFORMES	TROGLODYTIDAE	M-T	Thryothorus felix	26.455	-108.552	14	6	1963	104068	135
PASSERIFORMES	TROGLODYTIDAE	M-T	Thryothorus felix	27.595	-109.922	15	7	1963	104105	37
PASSERIFORMES	TROGLODYTIDAE	M-T	Thryothorus felix	25.915	-109.165	2	8	1933	104075	10
PASSERIFORMES	TROGLODYTIDAE	M-T	Thryothorus felix	27.6067	-109.935	21	9	1954	104092	37
PASSERIFORMES	TROGLODYTIDAE	M-T	Thryothorus felix	27.6067	-109.935	21	9	1954	104180	37
PASSERIFORMES	TROGLODYTIDAE	M-T	Thryothorus felix	27.6067	-109.935	21	9	1954	104181	37
PASSERIFORMES	TROGLODYTIDAE	M-T	Thryothorus sinaloa	24.81	-107.857	19	5	1934	102743	6
PASSERIFORMES	TROGLODYTIDAE	M-T	Thryothorus sinaloa	25.1033	-108.033	4	6	1904	102652	9
PASSERIFORMES	TROGLODYTIDAE	M-T	Thryothorus sinaloa	27.15	-109.4	20	6	1937	102722	42
PASSERIFORMES	TROGLODYTIDAE	M-T	Thryothorus sinaloa	26.455	-108.552	15	6	1963	102619	135
PASSERIFORMES	TROGLODYTIDAE	M-T	Thryothorus sinaloa	26.455	-108.552	16	6	1963	102620	135
PASSERIFORMES	TROGLODYTIDAE	M-T	Thryothorus sinaloa	26.455	-108.552	14	6	1963	102621	135
PASSERIFORMES	TROGLODYTIDAE	M-T	Thryothorus sinaloa	26.455	-108.552	12	6	1963	102622	135
PASSERIFORMES	TROGLODYTIDAE	M-T	Thryothorus sinaloa	23.9133	-106.9	6	6	1965	102634	10
PASSERIFORMES	TROGLODYTIDAE	M-T	Thryothorus sinaloa	27.6067	-109.935	27	9	1954	102659	37
PASSERIFORMES	EMBERIZIDAE	M?	Sporophila torqueola	24.81	-107.857	27	5	1934	180098	6
PASSERIFORMES	EMBERIZIDAE	M?	Sporophila torqueola	24.7967	-107.402	29	5	1934	180083	56
PASSERIFORMES	EMBERIZIDAE	M?	Sporophila torqueola	24.7967	-107.402	29	5	1934	180087	56
PASSERIFORMES	EMBERIZIDAE	M?	Sporophila torqueola	24.7967	-107.402	4	6	1934	180079	56
PASSERIFORMES	EMBERIZIDAE	M?	Sporophila torqueola	24.7967	-107.402	13	6	1934	180085	56
PASSERIFORMES	EMBERIZIDAE	M?	Sporophila torqueola	24.7967	-107.402	13	6	1934	180086	56
PASSERIFORMES	EMBERIZIDAE	M?	Sporophila torqueola	24.7967	-107.402	5	6	1934	180089	56
PASSERIFORMES	EMBERIZIDAE	M?	Sporophila torqueola	24.7967	-107.402	15	6	1934	180093	56
PASSERIFORMES	EMBERIZIDAE	T	Aimophila carpalis	26.415	-108.622	15	5	1933	193334	78
PASSERIFORMES	EMBERIZIDAE	T	Aimophila carpalis	24.81	-107.857	18	5	1934	193564	6
PASSERIFORMES	EMBERIZIDAE	T	Aimophila carpalis	25.08	-108.053	3	5	1934	193366	7
PASSERIFORMES	EMBERIZIDAE	T	Aimophila carpalis	25.08	-108.053	2	5	1934	193368	7
PASSERIFORMES	EMBERIZIDAE	T	Aimophila carpalis	25.08	-108.053	3	5	1934	193369	7
PASSERIFORMES	EMBERIZIDAE	T	Aimophila carpalis	26.35	-109.133	2	5	1947	193406	8
PASSERIFORMES	EMBERIZIDAE	T	Aimophila carpalis	27.2767	-109.443	1	5	1949	193396	121
PASSERIFORMES	EMBERIZIDAE	T	Aimophila carpalis	27.2767	-109.443	1	5	1949	193397	121
PASSERIFORMES	EMBERIZIDAE	T	Aimophila carpalis	27.2767	-109.443	1	5	1949	193398	121
PASSERIFORMES	EMBERIZIDAE	T	Aimophila carpalis	27.9183	-110.898	22	6	1928	193297	4
PASSERIFORMES	EMBERIZIDAE	T	Aimophila carpalis	27.4967	-109.947	19	6	1928	193298	33
PASSERIFORMES	EMBERIZIDAE	T	Aimophila carpalis	27.15	-109.4	22	6	1937	193561	42
PASSERIFORMES	EMBERIZIDAE	T	Aimophila carpalis	27.15	-109.4	21	6	1937	193562	42
PASSERIFORMES	EMBERIZIDAE	T	Aimophila carpalis	24.9917	-107.395	20	6	1955	193315	80
PASSERIFORMES	EMBERIZIDAE	T	Aimophila carpalis	26.455	-108.552	16	6	1963	193317	135
PASSERIFORMES	EMBERIZIDAE	T	Aimophila carpalis	26.455	-108.552	14	6	1963	193318	135
PASSERIFORMES	EMBERIZIDAE	T	Aimophila carpalis	27.585	-109.847	25	6	1964	193408	69
PASSERIFORMES	EMBERIZIDAE	T	Aimophila carpalis	26.7067	-109.628	11	6	1965	193512	3
PASSERIFORMES	EMBERIZIDAE	T	Aimophila carpalis	27.1183	-109.932	16	7	1963	193295	9
PASSERIFORMES	EMBERIZIDAE	T	Aimophila carpalis	25.46	-108.078	18	9	1933	193354	51
PASSERIFORMES	TROGLODYTIDAE	T	Campylorhynchus brunneicapillus	26.35	-109.133	18	5	1937	99174	8
PASSERIFORMES	TROGLODYTIDAE	T	Campylorhynchus brunneicapillus	26.35	-109.133	2	5	1947	99175	8
PASSERIFORMES	TROGLODYTIDAE	T	Campylorhynchus brunneicapillus	27.1683	-109.932	18	6	1928	98786	17
PASSERIFORMES	TROGLODYTIDAE	T	Campylorhynchus brunneicapillus	26.3667	-109.143	8	6	1930	99337	7
PASSERIFORMES	TROGLODYTIDAE	T	Campylorhynchus brunneicapillus	26.3667	-109.143	8	6	1930	99338	7
PASSERIFORMES	TROGLODYTIDAE	T	Campylorhynchus brunneicapillus	26.3883	-108.573	14	6	1963	99075	100
PASSERIFORMES	TROGLODYTIDAE	T	Campylorhynchus brunneicapillus	27.1183	-109.932	16	7	1963	98780	9
PICIFORMES	PICIDAE	T	Colaptes auratus	26.9917	-108.383	22	6	1936	19064	146
PICIFORMES	PICIDAE	T	Colaptes auratus	26.9917	-108.383	22	6	1936	19065	146
PICIFORMES	PICIDAE	T	Colaptes auratus	26.9917	-108.383	25	6	1936	19066	146
PICIFORMES	PICIDAE	T	Colaptes auratus	26.9917	-108.383	25	6	1936	19067	146
PICIFORMES	PICIDAE	T	Colaptes auratus	26.9917	-108.383	22	6	1936	19069	146
PICIFORMES	PICIDAE	T	Colaptes auratus	26.9917	-108.383	27	6	1936	19071	146
PICIFORMES	PICIDAE	T	Colaptes auratus	26.9917	-108.383	8	7	1936	19063	146
CUCULIFORMES	CUCULIDAE	T	Geococcyx californianus	27.31	-109.3	3	5	1945	2725	106
CUCULIFORMES	CUCULIDAE	T	Geococcyx californianus	27.31	-109.3	3	5	1945	2726	106
CUCULIFORMES	CUCULIDAE	T	Geococcyx californianus	27.9183	-110.898	23	6	1928	2559	4
CUCULIFORMES	CUCULIDAE	T	Geococcyx californianus	27.9183	-110.898	23	6	1928	2560	4
CUCULIFORMES	CUCULIDAE	T	Geococcyx californianus	27.9183	-110.898	28	6	1928	2561	4
CUCULIFORMES	CUCULIDAE	T	Geococcyx californianus	27.4967	-109.947	20	6	1928	2558	33
CUCULIFORMES	CUCULIDAE	T	Geococcyx californianus	26.7117	-109.275	19	6	1955	2707	51
CUCULIFORMES	CUCULIDAE	T	Geococcyx californianus	25.915	-109.165	26	8	1933	2692	10
PASSERIFORMES	TYRANNIDAE	T	Myiarchus tyrannulus	26.415	-108.622	12	5	1933	54575	78
PASSERIFORMES	TYRANNIDAE	T	Myiarchus tyrannulus	26.415	-108.622	13	5	1933	54576	78
PASSERIFORMES	TYRANNIDAE	T	Myiarchus tyrannulus	26.415	-108.622	13	5	1933	54577	78
PASSERIFORMES	TYRANNIDAE	T	Myiarchus tyrannulus	24.81	-107.857	18	5	1934	54578	6
PASSERIFORMES	TYRANNIDAE	T	Myiarchus tyrannulus	24.81	-107.857	18	5	1934	54580	6
PASSERIFORMES	TYRANNIDAE	T	Myiarchus tyrannulus	24.81	-107.857	15	5	1934	54581	6
PASSERIFORMES	TYRANNIDAE	T	Myiarchus tyrannulus	25.08	-108.053	3	5	1934	54590	7
PASSERIFORMES	TYRANNIDAE	T	Myiarchus tyrannulus	25.08	-108.053	2	5	1934	54591	7
PASSERIFORMES	TYRANNIDAE	T	Myiarchus tyrannulus	25.08	-108.053	4	5	1934	54592	7
PASSERIFORMES	TYRANNIDAE	T	Myiarchus tyrannulus	26.35	-109.133	19	5	1937	54622	8
PASSERIFORMES	TYRANNIDAE	T	Myiarchus tyrannulus	26.35	-109.133	19	5	1937	54623	8
PASSERIFORMES	TYRANNIDAE	T	Myiarchus tyrannulus	26.35	-109.133	17	5	1937	54624	8
PASSERIFORMES	TYRANNIDAE	T	Myiarchus tyrannulus	26.35	-109.133	2	5	1947	54625	8
PASSERIFORMES	TYRANNIDAE	T	Myiarchus tyrannulus	24.7967	-107.402	2	6	1934	54570	56
PASSERIFORMES	TYRANNIDAE	T	Myiarchus tyrannulus	24.7967	-107.402	1	6	1934	54571	56
PASSERIFORMES	TYRANNIDAE	T	Myiarchus tyrannulus	24.7967	-107.402	10	6	1934	54572	56
PASSERIFORMES	TYRANNIDAE	T	Myiarchus tyrannulus	24.7967	-107.402	12	6	1934	54573	56
PASSERIFORMES	TYRANNIDAE	T	Myiarchus tyrannulus	24.7967	-107.402	9	6	1934	54574	56
PASSERIFORMES	TYRANNIDAE	T	Myiarchus tyrannulus	27.5483	-109.95	3	6	1954	54617	33
PASSERIFORMES	TYRANNIDAE	T	Myiarchus tyrannulus	26.455	-108.552	12	6	1962	54564	135
PASSERIFORMES	TYRANNIDAE	T	Myiarchus tyrannulus	26.455	-108.552	16	6	1963	54565	135
PASSERIFORMES	TYRANNIDAE	T	Myiarchus tyrannulus	27.6567	-110.325	5	6	1965	54628	8
PASSERIFORMES	TYRANNIDAE	T	Myiarchus tyrannulus	27.6067	-109.935	18	9	1954	54619	37
PASSERIFORMES	TYRANNIDAE	T	Myiarchus tyrannulus	27.6067	-109.935	18	9	1954	54620	37
PASSERIFORMES	TYRANNIDAE	T	Myiarchus tyrannulus	27.6067	-109.935	23	9	1954	54807	37
PASSERIFORMES	TYRANNIDAE	T	Myiarchus tyrannulus	27.6067	-109.935	24	9	1954	54909	37
PASSERIFORMES	EMBERIZIDAE	T	Pipilo fuscus	26.415	-108.622	11	5	1933	190632	78
PASSERIFORMES	EMBERIZIDAE	T	Pipilo fuscus	27.2067	-109.522	2	5	1947	190765	71
PASSERIFORMES	EMBERIZIDAE	T	Pipilo fuscus	27.2067	-109.522	2	5	1947	190766	71
PASSERIFORMES	EMBERIZIDAE	T	Pipilo fuscus	26.35	-109.133	9	6	1930	190764	8
PASSERIFORMES	EMBERIZIDAE	T	Pipilo fuscus	27.15	-109.4	23	6	1937	190857	42
PASSERIFORMES	EMBERIZIDAE	T	Pipilo fuscus	27.15	-109.4	21	6	1937	190859	42
PASSERIFORMES	EMBERIZIDAE	T	Pipilo fuscus	26.455	-108.552	14	6	1963	190631	135
PASSERIFORMES	CARDINALIDAE	T?	Cardinalis cardinalis	27.585	-109.847	8	5	1888	211992	69
PASSERIFORMES	CARDINALIDAE	T?	Cardinalis cardinalis	27.585	-109.847	9	5	1888	211999	69
PASSERIFORMES	CARDINALIDAE	T?	Cardinalis cardinalis	26.415	-108.622	12	5	1933	212608	78
PASSERIFORMES	CARDINALIDAE	T?	Cardinalis cardinalis	24.81	-107.857	26	5	1934	212613	6
PASSERIFORMES	CARDINALIDAE	T?	Cardinalis cardinalis	24.81	-107.857	21	5	1934	212619	6
PASSERIFORMES	CARDINALIDAE	T?	Cardinalis cardinalis	25.08	-108.053	1	5	1934	212641	7
PASSERIFORMES	CARDINALIDAE	T?	Cardinalis cardinalis	25.08	-108.053	1	5	1934	212642	7
PASSERIFORMES	CARDINALIDAE	T?	Cardinalis cardinalis	27.9183	-110.898	25	6	1928	211890	4
PASSERIFORMES	CARDINALIDAE	T?	Cardinalis cardinalis	26.35	-109.133	9	6	1930	212782	8
PASSERIFORMES	CARDINALIDAE	T?	Cardinalis cardinalis	27.5483	-109.95	2	6	1954	212747	33
PASSERIFORMES	CARDINALIDAE	T?	Cardinalis cardinalis	27.5483	-109.95	2	6	1954	212748	33
PASSERIFORMES	CARDINALIDAE	T?	Cardinalis cardinalis	25.9533	-109.035	20	6	1955	212592	8
PASSERIFORMES	CARDINALIDAE	T?	Cardinalis cardinalis	25.915	-109.165	22	8	1933	212593	10
PASSERIFORMES	CARDINALIDAE	T?	Cardinalis cardinalis	25.915	-109.165	6	8	1933	212594	10
PASSERIFORMES	CARDINALIDAE	T?	Cardinalis sinuatus	27.31	-109.3	4	5	1945	213896	106
PASSERIFORMES	CARDINALIDAE	T?	Cardinalis sinuatus	24.86	-108.1	14	5	1970	213973	3
PASSERIFORMES	CARDINALIDAE	T?	Cardinalis sinuatus	27.9183	-110.898	28	6	1928	213481	4
PASSERIFORMES	CARDINALIDAE	T?	Cardinalis sinuatus	27.9183	-110.898	12	6	1928	213482	4
PASSERIFORMES	CARDINALIDAE	T?	Cardinalis sinuatus	27.9183	-110.898	22	6	1928	213483	4
PASSERIFORMES	CARDINALIDAE	T?	Cardinalis sinuatus	27.9183	-110.898	22	6	1928	213484	4
PASSERIFORMES	CARDINALIDAE	T?	Cardinalis sinuatus	27.9183	-110.898	26	6	1928	213485	4
PASSERIFORMES	CARDINALIDAE	T?	Passerina versicolor	24.81	-107.857	22	5	1934	220954	6
PASSERIFORMES	CARDINALIDAE	T?	Passerina versicolor	24.81	-107.857	23	5	1934	220955	6
PASSERIFORMES	CARDINALIDAE	T?	Passerina versicolor	24.81	-107.857	27	5	1934	220956	6
PASSERIFORMES	CARDINALIDAE	T?	Passerina versicolor	24.81	-107.857	16	5	1934	220957	6
PASSERIFORMES	CARDINALIDAE	T?	Passerina versicolor	25.08	-108.053	3	5	1934	221024	7
PASSERIFORMES	CARDINALIDAE	T?	Passerina versicolor	25.08	-108.053	5	5	1934	221025	7
PASSERIFORMES	CARDINALIDAE	T?	Passerina versicolor	24.7967	-107.402	29	5	1934	220950	56
PASSERIFORMES	CARDINALIDAE	T?	Passerina versicolor	25.1033	-108.033	1	6	1904	220991	9
PASSERIFORMES	CARDINALIDAE	T?	Passerina versicolor	24.7967	-107.402	4	6	1934	220944	56
PASSERIFORMES	CARDINALIDAE	T?	Passerina versicolor	24.7967	-107.402	15	6	1934	220945	56
PASSERIFORMES	CARDINALIDAE	T?	Passerina versicolor	24.7967	-107.402	6	6	1934	220949	56
PASSERIFORMES	CARDINALIDAE	T?	Passerina versicolor	24.7967	-107.402	2	6	1934	220953	56
PASSERIFORMES	CARDINALIDAE	T?	Passerina versicolor	24.7967	-107.402	5	6	1934	221284	56
PASSERIFORMES	CARDINALIDAE	T?	Passerina versicolor	26.455	-108.552	15	6	1963	220891	135
PASSERIFORMES	CARDINALIDAE	T?	Passerina versicolor	26.455	-108.552	12	6	1963	220892	135
PASSERIFORMES	CARDINALIDAE	T?	Passerina versicolor	26.455	-108.552	12	6	1963	220893	135
PASSERIFORMES	CARDINALIDAE	T?	Passerina versicolor	26.405	-109.012	11	6	1965	221002	42
PASSERIFORMES	CARDINALIDAE	T?	Passerina versicolor	25.5867	-108.085	18	7	1963	220236	96
PASSERIFORMES	CARDINALIDAE	T?	Passerina versicolor	25.46	-108.078	29	9	1933	220976	51
PASSERIFORMES	SYLVIIDAE	T?	Polioptila melanura	27.9183	-110.898	22	6	1928	112808	4
PASSERIFORMES	SYLVIIDAE	T?	Polioptila nigriceps	26.415	-108.622	12	5	1933	113245	78
PASSERIFORMES	SYLVIIDAE	T?	Polioptila nigriceps	26.415	-108.622	15	5	1933	113246	78
PASSERIFORMES	SYLVIIDAE	T?	Polioptila nigriceps	26.415	-108.622	15	5	1933	113247	78
PASSERIFORMES	SYLVIIDAE	T?	Polioptila nigriceps	25.08	-108.053	2	5	1934	113276	7
PASSERIFORMES	SYLVIIDAE	T?	Polioptila nigriceps	26.3656	-109.237	15	5	1937	113313	1
PASSERIFORMES	SYLVIIDAE	T?	Polioptila nigriceps	26.35	-109.133	2	5	1947	113287	8
PASSERIFORMES	SYLVIIDAE	T?	Polioptila nigriceps	24.7967	-107.402	2	6	1934	113244	56
PASSERIFORMES	SYLVIIDAE	T?	Polioptila nigriceps	27.5483	-109.95	2	6	1954	113283	33
PASSERIFORMES	SYLVIIDAE	T?	Polioptila nigriceps	27.5483	-109.95	2	6	1954	113284	33
PASSERIFORMES	SYLVIIDAE	T?	Polioptila nigriceps	26.455	-108.552	12	6	1963	113226	135
PASSERIFORMES	SYLVIIDAE	T?	Polioptila nigriceps	26.455	-108.552	12	6	1963	113227	135
PASSERIFORMES	SYLVIIDAE	T?	Polioptila nigriceps	26.455	-108.552	15	6	1963	113228	135
PASSERIFORMES	SYLVIIDAE	T?	Polioptila nigriceps	25.915	-109.165	7	8	1933	113230	10
PASSERIFORMES	SYLVIIDAE	T?	Polioptila nigriceps	25.915	-109.165	4	8	1933	113231	10
PASSERIFORMES	SYLVIIDAE	T?	Polioptila nigriceps	25.915	-109.165	7	8	1933	113232	10
PASSERIFORMES	SYLVIIDAE	T?	Polioptila nigriceps	25.915	-109.165	12	8	1933	113233	10
PASSERIFORMES	SYLVIIDAE	T?	Polioptila nigriceps	25.46	-108.078	18	9	1933	113256	51
PASSERIFORMES	AEGITHALIDAE	T?	Psaltriparus minimus	26.9917	-108.383	3	7	1936	92047	146
PASSERIFORMES	AEGITHALIDAE	T?	Psaltriparus minimus	26.9917	-108.383	3	7	1936	92048	146
PASSERIFORMES	AEGITHALIDAE	T?	Psaltriparus minimus	26.9917	-108.383	5	7	1936	92049	146
PASSERIFORMES	AEGITHALIDAE	T?	Psaltriparus minimus	26.9917	-108.383	7	7	1936	92050	146
PASSERIFORMES	AEGITHALIDAE	T?	Psaltriparus minimus	26.9917	-108.383	6	7	1936	92051	146
PASSERIFORMES	AEGITHALIDAE	T?	Psaltriparus minimus	26.9917	-108.383	5	7	1936	92052	146
PASSERIFORMES	AEGITHALIDAE	T?	Psaltriparus minimus	26.9917	-108.383	5	7	1936	92053	146
PASSERIFORMES	AEGITHALIDAE	T?	Psaltriparus minimus	26.9917	-108.383	12	7	1936	92054	146
PASSERIFORMES	AEGITHALIDAE	T?	Psaltriparus minimus	26.9917	-108.383	7	7	1936	92055	146
PASSERIFORMES	AEGITHALIDAE	T?	Psaltriparus minimus	26.9917	-108.383	6	7	1936	92056	146
PASSERIFORMES	AEGITHALIDAE	T?	Psaltriparus minimus	26.9917	-108.383	12	7	1936	92057	146
PASSERIFORMES	AEGITHALIDAE	T?	Psaltriparus minimus	26.9917	-108.383	6	7	1936	92058	146
PASSERIFORMES	AEGITHALIDAE	T?	Psaltriparus minimus	26.9917	-108.383	1	7	1936	92059	146
PASSERIFORMES	AEGITHALIDAE	T?	Psaltriparus minimus	26.9917	-108.383	12	7	1936	92060	146
PASSERIFORMES	AEGITHALIDAE	T?	Psaltriparus minimus	26.9917	-108.383	2	7	1936	92061	146
PASSERIFORMES	MIMIDAE	T?	Toxostoma bendirei	27.9183	-110.898	25	6	1928	131803	4
PASSERIFORMES	MIMIDAE	T?	Toxostoma curvirostre	27.075	-109.577	5	5	1888	133043	23
PASSERIFORMES	MIMIDAE	T?	Toxostoma curvirostre	27.585	-109.847	8	5	1888	133041	69
PASSERIFORMES	MIMIDAE	T?	Toxostoma curvirostre	26.65	-108.467	29	5	1888	133039	189
PASSERIFORMES	MIMIDAE	T?	Toxostoma curvirostre	26.415	-108.622	14	5	1933	133125	78
PASSERIFORMES	MIMIDAE	T?	Toxostoma curvirostre	26.415	-108.622	14	5	1933	133126	78
PASSERIFORMES	MIMIDAE	T?	Toxostoma curvirostre	26.415	-108.622	14	5	1933	133140	78
PASSERIFORMES	MIMIDAE	T?	Toxostoma curvirostre	24.81	-107.857	23	5	1934	133127	6
PASSERIFORMES	MIMIDAE	T?	Toxostoma curvirostre	24.81	-107.857	16	5	1934	133151	6
PASSERIFORMES	MIMIDAE	T?	Toxostoma curvirostre	25.08	-108.053	2	5	1934	133164	7
PASSERIFORMES	MIMIDAE	T?	Toxostoma curvirostre	26.35	-109.133	18	5	1937	133203	8
PASSERIFORMES	MIMIDAE	T?	Toxostoma curvirostre	26.35	-109.133	17	5	1937	133204	8
PASSERIFORMES	MIMIDAE	T?	Toxostoma curvirostre	24.81	-107.857	23	5	1943	133128	6
PASSERIFORMES	MIMIDAE	T?	Toxostoma curvirostre	25.1033	-108.033	1	6	1904	133147	9
PASSERIFORMES	MIMIDAE	T?	Toxostoma curvirostre	27.4967	-109.947	19	6	1928	133031	33
PASSERIFORMES	MIMIDAE	T?	Toxostoma curvirostre	26.35	-109.133	8	6	1930	133202	8
PASSERIFORMES	MIMIDAE	T?	Toxostoma curvirostre	27.5817	-110.007	8	6	1933	133184	27
PASSERIFORMES	MIMIDAE	T?	Toxostoma curvirostre	27.5817	-110.007	8	6	1933	133185	27
PASSERIFORMES	MIMIDAE	T?	Toxostoma curvirostre	24.7967	-107.402	3	6	1934	133123	56
PASSERIFORMES	MIMIDAE	T?	Toxostoma curvirostre	27.5483	-109.95	2	6	1954	133198	33
PASSERIFORMES	MIMIDAE	T?	Toxostoma curvirostre	25.9533	-109.052	20	6	1955	133097	54
PASSERIFORMES	MIMIDAE	T?	Toxostoma curvirostre	26.455	-108.552	12	6	1963	133098	135
PASSERIFORMES	MIMIDAE	T?	Toxostoma curvirostre	26.455	-108.552	13	6	1963	133099	135
PASSERIFORMES	MIMIDAE	T?	Toxostoma curvirostre	27.1183	-109.932	16	7	1963	133028	9
PASSERIFORMES	MIMIDAE	T?	Toxostoma curvirostre	27.595	-109.922	15	7	1963	133389	37
PASSERIFORMES	MIMIDAE	T?	Toxostoma curvirostre	25.5867	-108.085	18	7	1963	133026	96
PASSERIFORMES	MIMIDAE	T?	Toxostoma curvirostre	25.5867	-108.085	18	7	1963	133029	96
PASSERIFORMES	MIMIDAE	T?	Toxostoma curvirostre	25.915	-109.165	4	8	1933	133102	10
PASSERIFORMES	MIMIDAE	T?	Toxostoma curvirostre	26.35	-109.133	99	9	1880	133034	8
PASSERIFORMES	MIMIDAE	T?	Toxostoma curvirostre	25.915	-109.165	11	9	1933	133101	10
PASSERIFORMES	EMBERIZIDAE		Aimophila botterii	24.81	-107.857	22	5	1934	193076	6
PASSERIFORMES	EMBERIZIDAE		Aimophila botterii	24.81	-107.857	22	5	1934	193077	6
PASSERIFORMES	EMBERIZIDAE		Aimophila botterii	24.81	-107.857	23	5	1934	193078	6
PASSERIFORMES	EMBERIZIDAE		Aimophila botterii	24.81	-107.857	23	5	1934	193079	6
PASSERIFORMES	EMBERIZIDAE		Aimophila botterii	24.81	-107.857	23	5	1934	193080	6
PASSERIFORMES	EMBERIZIDAE		Aimophila botterii	24.81	-107.857	25	5	1934	193081	6
PASSERIFORMES	EMBERIZIDAE		Aimophila botterii	24.81	-107.857	25	5	1934	193082	6
PASSERIFORMES	EMBERIZIDAE		Aimophila ruficeps	26.9917	-108.383	28	6	1936	194249	146
PASSERIFORMES	EMBERIZIDAE		Aimophila ruficeps	26.9917	-108.383	28	6	1936	194250	146
PASSERIFORMES	EMBERIZIDAE		Aimophila ruficeps	26.9917	-108.383	28	6	1936	194251	146
PASSERIFORMES	EMBERIZIDAE		Aimophila ruficeps	26.9917	-108.383	26	6	1936	194253	146
PASSERIFORMES	EMBERIZIDAE		Aimophila ruficeps	26.9917	-108.383	26	6	1936	194254	146
PASSERIFORMES	EMBERIZIDAE		Aimophila ruficeps	26.9917	-108.383	19	6	1936	194255	146
PASSERIFORMES	EMBERIZIDAE		Aimophila ruficeps	26.9917	-108.383	28	6	1936	194256	146
PASSERIFORMES	EMBERIZIDAE		Aimophila ruficeps	26.9917	-108.383	28	6	1936	194258	146
PASSERIFORMES	EMBERIZIDAE		Aimophila ruficeps	26.9917	-108.383	26	6	1936	194259	146
PASSERIFORMES	EMBERIZIDAE		Aimophila ruficeps	26.9917	-108.383	26	6	1936	194262	146
PASSERIFORMES	EMBERIZIDAE		Aimophila ruficeps	26.9917	-108.383	22	6	1936	194263	146
PASSERIFORMES	EMBERIZIDAE		Aimophila ruficeps	26.9917	-108.383	28	6	1936	194264	146
PASSERIFORMES	EMBERIZIDAE		Aimophila ruficeps	26.9917	-108.383	28	6	1936	194265	146
PASSERIFORMES	EMBERIZIDAE		Aimophila ruficeps	26.9917	-108.383	28	6	1936	194266	146
PASSERIFORMES	EMBERIZIDAE		Aimophila ruficeps	26.9917	-108.383	7	7	1936	194252	146
PASSERIFORMES	EMBERIZIDAE		Aimophila ruficeps	26.9917	-108.383	14	7	1936	194257	146
PASSERIFORMES	EMBERIZIDAE		Aimophila ruficeps	26.9917	-108.383	14	7	1936	194260	146
PASSERIFORMES	EMBERIZIDAE		Aimophila ruficeps	26.9917	-108.383	8	7	1936	194261	146
APODIFORMES	TROCHILIDAE		Amazilia rutila	24.81	-107.857	26	5	1934	261993	6
APODIFORMES	TROCHILIDAE		Amazilia rutila	24.7967	-107.402	17	6	1934	261992	56
APODIFORMES	TROCHILIDAE		Amazilia violiceps	24.7967	-107.402	15	6	1934	262879	56
APODIFORMES	TROCHILIDAE		Amazilia violiceps	24.7967	-107.402	10	6	1934	262880	56
APODIFORMES	TROCHILIDAE		Amazilia violiceps	25.9533	-109.052	20	6	1955	262833	54
APODIFORMES	TROCHILIDAE		Amazilia violiceps	25.9533	-109.052	20	6	1955	262835	54
APODIFORMES	TROCHILIDAE		Amazilia violiceps	25.9533	-109.052	20	6	1955	262836	54
APODIFORMES	TROCHILIDAE		Amazilia violiceps	26.455	-108.552	13	6	1963	262838	135
APODIFORMES	TROCHILIDAE		Amazilia violiceps	26.455	-108.552	13	6	1963	262839	135
APODIFORMES	TROCHILIDAE		Amazilia violiceps	26.455	-108.552	13	6	1963	262840	135
APODIFORMES	TROCHILIDAE		Amazilia violiceps	26.455	-108.552	12	6	1963	262841	135
APODIFORMES	TROCHILIDAE		Amazilia violiceps	26.455	-108.552	15	6	1963	262842	135
APODIFORMES	TROCHILIDAE		Amazilia violiceps	26.455	-108.552	16	6	1963	262843	135
APODIFORMES	TROCHILIDAE		Amazilia violiceps	26.455	-108.552	16	6	1963	262844	135
APODIFORMES	TROCHILIDAE		Amazilia violiceps	26.455	-108.552	12	6	1963	262845	135
APODIFORMES	TROCHILIDAE		Amazilia violiceps	26.455	-108.552	15	6	1963	262993	135
APODIFORMES	TROCHILIDAE		Amazilia violiceps	26.455	-108.552	14	6	1963	262994	135
APODIFORMES	TROCHILIDAE		Amazilia violiceps	26.455	-108.552	16	6	1963	262995	135
APODIFORMES	TROCHILIDAE		Amazilia violiceps	25.915	-109.165	9	8	1933	262847	10
APODIFORMES	TROCHILIDAE		Amazilia violiceps	25.915	-109.165	19	8	1933	262848	10
APODIFORMES	TROCHILIDAE		Amazilia violiceps	25.915	-109.165	14	8	1933	262849	10
APODIFORMES	TROCHILIDAE		Amazilia violiceps	25.915	-109.165	19	8	1933	262850	10
APODIFORMES	TROCHILIDAE		Amazilia violiceps	25.915	-109.165	15	8	1933	262851	10
APODIFORMES	TROCHILIDAE		Amazilia violiceps	25.915	-109.165	10	8	1933	262852	10
APODIFORMES	TROCHILIDAE		Amazilia violiceps	25.915	-109.165	9	8	1933	262853	10
APODIFORMES	TROCHILIDAE		Amazilia violiceps	25.915	-109.165	7	8	1933	262854	10
APODIFORMES	TROCHILIDAE		Amazilia violiceps	25.915	-109.165	13	8	1933	262855	10
APODIFORMES	TROCHILIDAE		Amazilia violiceps	25.915	-109.165	31	8	1933	262856	10
APODIFORMES	TROCHILIDAE		Amazilia violiceps	25.915	-109.165	13	8	1933	262857	10
APODIFORMES	TROCHILIDAE		Amazilia violiceps	25.915	-109.165	14	8	1933	262859	10
APODIFORMES	TROCHILIDAE		Amazilia violiceps	25.915	-109.165	17	8	1933	262860	10
APODIFORMES	TROCHILIDAE		Amazilia violiceps	25.915	-109.165	9	8	1933	262861	10
APODIFORMES	TROCHILIDAE		Amazilia violiceps	25.915	-109.165	20	8	1933	262862	10
APODIFORMES	TROCHILIDAE		Amazilia violiceps	25.915	-109.165	1	9	1933	262858	10
APODIFORMES	TROCHILIDAE		Amazilia violiceps	27.6067	-109.935	19	9	1954	262926	37
APODIFORMES	TROCHILIDAE		Amazilia violiceps	27.6067	-109.935	26	9	1954	262928	37
PASSERIFORMES	EMBERIZIDAE		Amphispiza bilineata	27.9183	-110.898	15	6	1928	199997	4
PASSERIFORMES	EMBERIZIDAE		Amphispiza bilineata	27.9183	-110.898	15	6	1928	199998	4
PASSERIFORMES	EMBERIZIDAE		Amphispiza bilineata	27.9183	-110.898	2	7	1932	199989	4
PASSERIFORMES	CORVIDAE		Aphelocoma ultramarina	27.1617	-108.97	28	5	1947	82874	197
PASSERIFORMES	EMBERIZIDAE		Arremonops rufivirgatus	24.81	-107.857	22	5	1934	185629	6
PASSERIFORMES	EMBERIZIDAE		Arremonops rufivirgatus	25.1033	-108.033	2	6	1904	185631	9
APODIFORMES	TROCHILIDAE		Atthis heloisa	25.8017	-109.022	18	5	1931	270142	9
PASSERIFORMES	TYRANNIDAE		Attila spadiceus	26.9917	-108.383	11	7	1936	48725	146
PASSERIFORMES	REMIZIDAE		Auriparus flaviceps	27.585	-109.847	8	5	1888	90323	69
PASSERIFORMES	REMIZIDAE		Auriparus flaviceps	26.415	-108.622	11	5	1933	90822	78
PASSERIFORMES	REMIZIDAE		Auriparus flaviceps	26.415	-108.622	15	5	1933	90823	78
PASSERIFORMES	REMIZIDAE		Auriparus flaviceps	26.415	-108.622	11	5	1933	91057	78
PASSERIFORMES	REMIZIDAE		Auriparus flaviceps	24.81	-107.857	22	5	1934	90824	6
PASSERIFORMES	REMIZIDAE		Auriparus flaviceps	24.81	-107.857	18	5	1934	90826	6
PASSERIFORMES	REMIZIDAE		Auriparus flaviceps	26.35	-109.133	18	5	1937	90894	8
PASSERIFORMES	REMIZIDAE		Auriparus flaviceps	26.35	-109.133	2	5	1947	90893	8
PASSERIFORMES	REMIZIDAE		Auriparus flaviceps	27.4833	-109.967	18	6	1928	90919	33
PASSERIFORMES	REMIZIDAE		Auriparus flaviceps	27.5817	-110.007	8	6	1933	91024	27
PASSERIFORMES	REMIZIDAE		Auriparus flaviceps	27.5483	-109.95	2	6	1954	90879	33
PASSERIFORMES	REMIZIDAE		Auriparus flaviceps	26.455	-108.552	16	6	1963	90814	135
PASSERIFORMES	REMIZIDAE		Auriparus flaviceps	26.455	-108.552	12	6	1963	90815	135
PASSERIFORMES	REMIZIDAE		Auriparus flaviceps	26.455	-108.552	14	6	1963	90816	135
PASSERIFORMES	REMIZIDAE		Auriparus flaviceps	27.0933	-109.913	17	7	1963	91048	6
PASSERIFORMES	REMIZIDAE		Auriparus flaviceps	25.46	-108.078	20	9	1933	90832	51
PASSERIFORMES	PARIDAE		Baeolophus wollweberi	26.9917	-108.383	20	6	1936	89503	146
PASSERIFORMES	PARIDAE		Baeolophus wollweberi	26.9917	-108.383	22	6	1936	89508	146
PASSERIFORMES	PARIDAE		Baeolophus wollweberi	26.9917	-108.383	19	6	1936	89513	146
PASSERIFORMES	PARIDAE		Baeolophus wollweberi	26.9917	-108.383	19	6	1936	89515	146
PASSERIFORMES	PARIDAE		Baeolophus wollweberi	26.9917	-108.383	3	7	1936	89499	146
PASSERIFORMES	PARIDAE		Baeolophus wollweberi	26.9917	-108.383	7	7	1936	89500	146
PASSERIFORMES	PARIDAE		Baeolophus wollweberi	26.9917	-108.383	2	7	1936	89504	146
PASSERIFORMES	PARIDAE		Baeolophus wollweberi	26.9917	-108.383	9	7	1936	89505	146
PASSERIFORMES	PARIDAE		Baeolophus wollweberi	26.9917	-108.383	12	7	1936	89510	146
PASSERIFORMES	PARIDAE		Baeolophus wollweberi	26.9917	-108.383	7	7	1936	89512	146
PASSERIFORMES	PARIDAE		Baeolophus wollweberi	26.9917	-108.383	10	7	1936	89516	146
PASSERIFORMES	PARIDAE		Baeolophus wollweberi	26.9917	-108.383	17	7	1936	89518	146
PASSERIFORMES	PARULIDAE		Basileuterus rufifrons	24.0217	-106.972	27	7	1961	160974	20
PASSERIFORMES	PARULIDAE		Basileuterus rufifrons	24.0217	-106.972	27	7	1961	160976	20
APODIFORMES	TROCHILIDAE		Calypte anna	25.46	-108.078	19	9	1933	269702	51
PASSERIFORMES	TYRANNIDAE		Camptostoma imberbe	27.225	-109.248	20	5	1931	30437	64
PASSERIFORMES	TYRANNIDAE		Camptostoma imberbe	24.81	-107.857	18	5	1934	30333	6
PASSERIFORMES	TYRANNIDAE		Camptostoma imberbe	24.81	-107.857	22	5	1934	30334	6
PASSERIFORMES	TYRANNIDAE		Camptostoma imberbe	25.08	-108.053	3	5	1934	30361	7
PASSERIFORMES	TYRANNIDAE		Camptostoma imberbe	25.08	-108.053	1	5	1934	30362	7
PASSERIFORMES	TYRANNIDAE		Camptostoma imberbe	25.08	-108.053	2	5	1934	30363	7
PASSERIFORMES	TYRANNIDAE		Camptostoma imberbe	25.08	-108.053	6	5	1934	30364	7
PASSERIFORMES	TYRANNIDAE		Camptostoma imberbe	25.08	-108.053	5	5	1934	30365	7
PASSERIFORMES	TYRANNIDAE		Camptostoma imberbe	25.08	-108.053	1	5	1934	30368	7
PASSERIFORMES	TYRANNIDAE		Camptostoma imberbe	27.225	-109.248	99	6	1931	30438	64
PASSERIFORMES	TYRANNIDAE		Camptostoma imberbe	24.7967	-107.402	2	6	1934	30328	56
PASSERIFORMES	TYRANNIDAE		Camptostoma imberbe	27.15	-109.4	21	6	1937	30459	42
PASSERIFORMES	TYRANNIDAE		Camptostoma imberbe	26.455	-108.552	14	6	1963	30307	135
PASSERIFORMES	TYRANNIDAE		Camptostoma imberbe	25.915	-109.165	26	8	1933	30311	10
PASSERIFORMES	FRINGILLIDAE		Carduelis notata	26.9917	-108.383	29	6	1936	245950	146
PASSERIFORMES	FRINGILLIDAE		Carduelis notata	26.9917	-108.383	28	6	1936	245954	146
PASSERIFORMES	FRINGILLIDAE		Carduelis notata	26.9917	-108.383	21	6	1936	245955	146
PASSERIFORMES	FRINGILLIDAE		Carduelis notata	26.9917	-108.383	30	6	1936	245956	146
PASSERIFORMES	FRINGILLIDAE		Carduelis notata	26.9917	-108.383	28	6	1936	245957	146
PASSERIFORMES	FRINGILLIDAE		Carduelis notata	26.9917	-108.383	26	6	1936	245960	146
PASSERIFORMES	FRINGILLIDAE		Carduelis notata	26.9917	-108.383	12	7	1936	245948	146
PASSERIFORMES	FRINGILLIDAE		Carduelis notata	26.9917	-108.383	9	7	1936	245949	146
PASSERIFORMES	FRINGILLIDAE		Carduelis notata	26.9917	-108.383	9	7	1936	245952	146
PASSERIFORMES	FRINGILLIDAE		Carduelis notata	26.9917	-108.383	18	7	1936	245953	146
PASSERIFORMES	FRINGILLIDAE		Carduelis psaltria	27.5817	-110.007	6	6	1933	247621	27
PASSERIFORMES	FRINGILLIDAE		Carduelis psaltria	27.5817	-110.007	6	6	1933	247622	27
PASSERIFORMES	FRINGILLIDAE		Carduelis psaltria	25.915	-109.165	10	8	1933	247526	10
PASSERIFORMES	FRINGILLIDAE		Carduelis psaltria	25.915	-109.165	15	8	1933	247527	10
PASSERIFORMES	FRINGILLIDAE		Carduelis psaltria	25.915	-109.165	15	8	1933	247528	10
PASSERIFORMES	FRINGILLIDAE		Carduelis psaltria	25.915	-109.165	12	8	1933	247529	10
PASSERIFORMES	FRINGILLIDAE		Carpodacus mexicanus	24.81	-107.857	26	5	1934	242798	6
PASSERIFORMES	FRINGILLIDAE		Carpodacus mexicanus	24.81	-107.857	26	5	1934	242800	6
PASSERIFORMES	FRINGILLIDAE		Carpodacus mexicanus	24.81	-107.857	26	5	1934	242801	6
PASSERIFORMES	FRINGILLIDAE		Carpodacus mexicanus	24.81	-107.857	26	5	1934	242802	6
PASSERIFORMES	FRINGILLIDAE		Carpodacus mexicanus	25.08	-108.053	1	5	1934	242819	7
PASSERIFORMES	FRINGILLIDAE		Carpodacus mexicanus	25.08	-108.053	7	5	1934	242820	7
PASSERIFORMES	FRINGILLIDAE		Carpodacus mexicanus	25.08	-108.053	5	5	1934	242821	7
PASSERIFORMES	FRINGILLIDAE		Carpodacus mexicanus	25.08	-108.053	5	5	1934	242823	7
PASSERIFORMES	FRINGILLIDAE		Carpodacus mexicanus	25.08	-108.053	2	5	1934	242824	7
PASSERIFORMES	FRINGILLIDAE		Carpodacus mexicanus	26.35	-109.133	17	5	1937	243851	8
PASSERIFORMES	FRINGILLIDAE		Carpodacus mexicanus	26.35	-109.133	19	5	1937	243852	8
PASSERIFORMES	FRINGILLIDAE		Carpodacus mexicanus	25.08	-108.053	99	5	1938	242825	7
PASSERIFORMES	FRINGILLIDAE		Carpodacus mexicanus	27.9183	-110.898	22	6	1928	243315	4
PASSERIFORMES	FRINGILLIDAE		Carpodacus mexicanus	27.9183	-110.898	22	6	1928	243316	4
PASSERIFORMES	FRINGILLIDAE		Carpodacus mexicanus	27.4967	-109.947	20	6	1928	243314	33
PASSERIFORMES	FRINGILLIDAE		Carpodacus mexicanus	26.35	-109.133	9	6	1930	243849	8
PASSERIFORMES	FRINGILLIDAE		Carpodacus mexicanus	26.35	-109.133	9	6	1930	243850	8
PASSERIFORMES	FRINGILLIDAE		Carpodacus mexicanus	27.5817	-110.007	8	6	1933	244014	27
PASSERIFORMES	FRINGILLIDAE		Carpodacus mexicanus	24.7967	-107.402	3	6	1934	242774	56
PASSERIFORMES	FRINGILLIDAE		Carpodacus mexicanus	24.7967	-107.402	10	6	1934	242776	56
PASSERIFORMES	FRINGILLIDAE		Carpodacus mexicanus	24.7967	-107.402	17	6	1934	242777	56
PASSERIFORMES	FRINGILLIDAE		Carpodacus mexicanus	24.7967	-107.402	4	6	1934	242778	56
PASSERIFORMES	FRINGILLIDAE		Carpodacus mexicanus	24.7967	-107.402	3	6	1934	242786	56
PASSERIFORMES	FRINGILLIDAE		Carpodacus mexicanus	27.15	-109.4	21	6	1937	244011	42
PASSERIFORMES	FRINGILLIDAE		Carpodacus mexicanus	27.15	-109.4	20	6	1937	244012	42
PASSERIFORMES	FRINGILLIDAE		Carpodacus mexicanus	27.15	-109.4	22	6	1937	244074	42
PASSERIFORMES	FRINGILLIDAE		Carpodacus mexicanus	27.15	-109.4	22	6	1937	244075	42
PASSERIFORMES	FRINGILLIDAE		Carpodacus mexicanus	25.08	-108.053	99	6	1938	242826	7
PASSERIFORMES	FRINGILLIDAE		Carpodacus mexicanus	25.9367	-108.925	6	6	1954	242765	23
PASSERIFORMES	FRINGILLIDAE		Carpodacus mexicanus	25.9367	-108.925	6	6	1954	242766	23
PASSERIFORMES	FRINGILLIDAE		Carpodacus mexicanus	27.5483	-109.95	3	6	1954	243831	33
PASSERIFORMES	FRINGILLIDAE		Carpodacus mexicanus	26.455	-108.552	14	6	1963	243819	135
PASSERIFORMES	FRINGILLIDAE		Carpodacus mexicanus	26.455	-108.552	15	6	1963	243820	135
PASSERIFORMES	FRINGILLIDAE		Carpodacus mexicanus	25.915	-109.165	24	8	1933	242768	10
PASSERIFORMES	FRINGILLIDAE		Carpodacus mexicanus	25.915	-109.165	9	8	1933	242769	10
PASSERIFORMES	FRINGILLIDAE		Carpodacus mexicanus	25.915	-109.165	18	8	1933	242770	10
PASSERIFORMES	FRINGILLIDAE		Carpodacus mexicanus	25.915	-109.165	11	9	1933	242767	10
PASSERIFORMES	TURDIDAE		Catharus aurantiirostris	26.9917	-108.383	1	5	1934	117623	146
PASSERIFORMES	TURDIDAE		Catharus ustulatus	27.6067	-109.935	23	9	1954	120527	37
PASSERIFORMES	TURDIDAE		Catharus ustulatus	27.6067	-109.935	21	9	1954	120528	37
PASSERIFORMES	TURDIDAE		Catharus ustulatus	27.6067	-109.935	19	9	1954	120529	37
PASSERIFORMES	CERTHIIDAE		Certhia americana	26.9917	-108.383	21	6	1936	94945	146
PASSERIFORMES	CERTHIIDAE		Certhia americana	26.9917	-108.383	29	6	1936	94954	146
PASSERIFORMES	CERTHIIDAE		Certhia americana	26.9917	-108.383	23	6	1936	94955	146
PASSERIFORMES	CERTHIIDAE		Certhia americana	26.9917	-108.383	15	7	1936	94943	146
PASSERIFORMES	CERTHIIDAE		Certhia americana	26.9917	-108.383	9	7	1936	94956	146
PASSERIFORMES	CERTHIIDAE		Certhia americana	26.9917	-108.383	18	7	1936	94957	146
PASSERIFORMES	CERTHIIDAE		Certhia americana	26.9917	-108.383	16	7	1936	94959	146
PASSERIFORMES	CERTHIIDAE		Certhia americana	26.9917	-108.383	4	7	1936	94960	146
PASSERIFORMES	CERTHIIDAE		Certhia americana	26.9917	-108.383	3	7	1936	94961	146
PASSERIFORMES	CERTHIIDAE		Certhia americana	26.9917	-108.383	2	7	1936	94962	146
PASSERIFORMES	CERTHIIDAE		Certhia americana	26.9917	-108.383	12	7	1936	94963	146
PASSERIFORMES	CERTHIIDAE		Certhia americana	26.9917	-108.383	9	7	1936	94965	146
PASSERIFORMES	EMBERIZIDAE		Chondestes grammacus	25.915	-109.165	27	8	1933	199668	10
PASSERIFORMES	FRINGILLIDAE		Coccothraustes abeillei	26.9917	-108.383	29	6	1936	247844	146
PASSERIFORMES	FRINGILLIDAE		Coccothraustes abeillei	26.9917	-108.383	19	6	1936	247845	146
PASSERIFORMES	FRINGILLIDAE		Coccothraustes abeillei	26.9917	-108.383	8	7	1936	247846	146
PASSERIFORMES	FRINGILLIDAE		Coccothraustes abeillei	26.9917	-108.383	18	7	1936	247847	146
PASSERIFORMES	FRINGILLIDAE		Coccothraustes abeillei	26.9917	-108.383	5	7	1936	247848	146
PASSERIFORMES	FRINGILLIDAE		Coccothraustes abeillei	26.9917	-108.383	19	7	1936	247849	146
PASSERIFORMES	FRINGILLIDAE		Coccothraustes abeillei	26.9917	-108.383	29	7	1936	247850	146
PASSERIFORMES	FRINGILLIDAE		Coccothraustes abeillei	26.9917	-108.383	19	7	1936	247851	146
PASSERIFORMES	FRINGILLIDAE		Coccothraustes abeillei	26.9917	-108.383	3	7	1936	247852	146
PASSERIFORMES	FRINGILLIDAE		Coccothraustes abeillei	26.9917	-108.383	5	7	1936	247853	146
CUCULIFORMES	CUCULIDAE		Coccyzus erythropthalmus	25.46	-108.078	21	9	1933	43	51
PICIFORMES	PICIDAE		Colaptes chrysoides	26.415	-108.622	14	5	1933	19712	78
PICIFORMES	PICIDAE		Colaptes chrysoides	26.415	-108.622	16	5	1933	19713	78
PICIFORMES	PICIDAE		Colaptes chrysoides	24.81	-107.857	18	5	1934	19714	6
PICIFORMES	PICIDAE		Colaptes chrysoides	24.81	-107.857	15	5	1934	19715	6
PICIFORMES	PICIDAE		Colaptes chrysoides	24.81	-107.857	18	5	1934	19720	6
PICIFORMES	PICIDAE		Colaptes chrysoides	24.7967	-107.402	13	6	1934	19708	56
PICIFORMES	PICIDAE		Colaptes chrysoides	24.7967	-107.402	4	6	1934	19709	56
PICIFORMES	PICIDAE		Colaptes chrysoides	27.17	-109.015	26	7	1971	19745	175
PICIFORMES	PICIDAE		Colaptes chrysoides	25.915	-109.165	27	8	1933	19702	10
PICIFORMES	PICIDAE		Colaptes chrysoides	25.46	-108.078	20	9	1933	19723	51
PASSERIFORMES	TYRANNIDAE		Contopus pertinax	26.9917	-108.383	29	6	1936	36023	146
PASSERIFORMES	TYRANNIDAE		Contopus pertinax	26.9917	-108.383	27	6	1936	36026	146
PASSERIFORMES	TYRANNIDAE		Contopus pertinax	26.9917	-108.383	24	6	1936	36027	146
PASSERIFORMES	TYRANNIDAE		Contopus pertinax	26.9917	-108.383	7	7	1936	36019	146
PASSERIFORMES	TYRANNIDAE		Contopus pertinax	26.9917	-108.383	14	7	1936	36025	146
PASSERIFORMES	TYRANNIDAE		Contopus pertinax	26.9917	-108.383	11	7	1936	36028	146
PASSERIFORMES	TYRANNIDAE		Contopus pertinax	26.9917	-108.383	18	7	1936	36029	146
PASSERIFORMES	TYRANNIDAE		Contopus sordidulus	27.8989	-110.588	12	5	1930	37013	90
PASSERIFORMES	TYRANNIDAE		Contopus sordidulus	26.415	-108.622	14	5	1933	36941	78
PASSERIFORMES	TYRANNIDAE		Contopus sordidulus	24.86	-108.1	9	5	1934	36945	3
PASSERIFORMES	TYRANNIDAE		Contopus sordidulus	26.35	-109.133	17	5	1937	36978	8
PASSERIFORMES	TYRANNIDAE		Contopus sordidulus	24.86	-108.1	13	5	1938	36944	3
PASSERIFORMES	CORVIDAE		Corvus corax	26.9917	-108.383	30	6	1930	248680	146
PASSERIFORMES	CORVIDAE		Corvus corax	26.9917	-108.383	30	6	1936	248679	146
PASSERIFORMES	CORVIDAE		Corvus corax	27.7583	-110.407	19	6	1955	248692	3
PASSERIFORMES	CORVIDAE		Corvus corax	27.4967	-109.947	19	6	1955	248524	33
PASSERIFORMES	CORVIDAE		Cyanocitta stelleri	26.9917	-108.383	26	6	1936	76430	146
PASSERIFORMES	CORVIDAE		Cyanocitta stelleri	26.9917	-108.383	28	6	1936	76436	146
PASSERIFORMES	CORVIDAE		Cyanocitta stelleri	26.9917	-108.383	4	7	1936	76428	146
PASSERIFORMES	CORVIDAE		Cyanocitta stelleri	26.9917	-108.383	10	7	1936	76431	146
PASSERIFORMES	CORVIDAE		Cyanocitta stelleri	26.9917	-108.383	16	7	1936	76435	146
PASSERIFORMES	CORVIDAE		Cyanocorax beecheii	24.81	-107.857	19	5	1934	80119	6
PASSERIFORMES	CORVIDAE		Cyanocorax beecheii	25.08	-108.053	6	5	1934	80145	7
PASSERIFORMES	CORVIDAE		Cyanocorax beecheii	25.1033	-108.033	1	6	1904	80131	9
PASSERIFORMES	CORVIDAE		Cyanocorax beecheii	25.1033	-108.033	1	6	1904	80132	9
PASSERIFORMES	CORVIDAE		Cyanocorax beecheii	24.9917	-107.395	21	6	1955	80105	80
PASSERIFORMES	CORVIDAE		Cyanocorax beecheii	24.9917	-107.395	20	6	1955	80106	80
PASSERIFORMES	CORVIDAE		Cyanocorax beecheii	24.9917	-107.395	21	6	1955	80107	80
PASSERIFORMES	CORVIDAE		Cyanocorax beecheii	24.9917	-107.395	20	6	1955	80108	80
PASSERIFORMES	CORVIDAE		Cyanocorax beecheii	24.9917	-107.395	20	6	1955	80109	80
PASSERIFORMES	CORVIDAE		Cyanocorax beecheii	24.9767	-107.397	20	6	1955	80110	111
APODIFORMES	TROCHILIDAE		Cynanthus latirostris	27.6067	-109.935	6	5	1933	255040	37
APODIFORMES	TROCHILIDAE		Cynanthus latirostris	27.1683	-109.932	18	6	1928	254236	17
APODIFORMES	TROCHILIDAE		Cynanthus latirostris	26.455	-108.552	16	6	1963	254804	135
APODIFORMES	TROCHILIDAE		Cynanthus latirostris	26.455	-108.552	12	6	1963	254805	135
APODIFORMES	TROCHILIDAE		Cynanthus latirostris	26.455	-108.552	16	6	1963	254806	135
APODIFORMES	TROCHILIDAE		Cynanthus latirostris	26.455	-108.552	13	6	1963	254807	135
APODIFORMES	TROCHILIDAE		Cynanthus latirostris	25.5867	-108.085	18	7	1963	254258	96
APODIFORMES	TROCHILIDAE		Cynanthus latirostris	25.915	-109.165	10	8	1933	254811	10
APODIFORMES	TROCHILIDAE		Cynanthus latirostris	25.915	-109.165	6	8	1933	254812	10
APODIFORMES	TROCHILIDAE		Cynanthus latirostris	25.46	-108.078	23	9	1933	254844	51
PASSERIFORMES	PARULIDAE		Dendroica coronata	27.6067	-109.935	26	9	1954	145651	37
PASSERIFORMES	PARULIDAE		Dendroica petechia	27.9167	-110.867	5	5	1930	142221	-5
PASSERIFORMES	PARULIDAE		Dendroica petechia	27.09	-109.918	1	5	1930	143174	5
PASSERIFORMES	PARULIDAE		Dendroica petechia	27.09	-109.918	1	5	1930	143175	5
PASSERIFORMES	PARULIDAE		Dendroica petechia	27.09	-109.918	1	5	1930	143180	5
PASSERIFORMES	PARULIDAE		Dendroica petechia	27.09	-109.918	1	5	1930	143183	5
PASSERIFORMES	PARULIDAE		Dendroica petechia	24.81	-107.857	16	5	1934	143773	6
PASSERIFORMES	PARULIDAE		Dendroica petechia	26.3656	-109.237	15	5	1937	143152	1
PASSERIFORMES	PARULIDAE		Dendroica petechia	26.3656	-109.237	14	5	1937	143153	1
PASSERIFORMES	PARULIDAE		Dendroica petechia	26.3656	-109.237	14	5	1937	143154	1
PASSERIFORMES	PARULIDAE		Dendroica petechia	26.3656	-109.237	14	5	1937	143203	1
PASSERIFORMES	PARULIDAE		Dendroica petechia	26.3656	-109.237	15	5	1937	143204	1
PASSERIFORMES	PARULIDAE		Dendroica petechia	26.3656	-109.237	15	5	1937	143206	1
PASSERIFORMES	PARULIDAE		Dendroica petechia	26.35	-109.133	18	5	1937	143145	8
PASSERIFORMES	PARULIDAE		Dendroica petechia	26.35	-109.133	16	5	1937	143148	8
PASSERIFORMES	PARULIDAE		Dendroica petechia	24.86	-108.1	11	5	1938	142205	3
PASSERIFORMES	PARULIDAE		Dendroica petechia	26.35	-109.133	1	5	1947	142211	8
PASSERIFORMES	PARULIDAE		Dendroica petechia	26.35	-109.133	1	5	1947	143146	8
PASSERIFORMES	PARULIDAE		Dendroica petechia	26.35	-109.133	1	5	1947	143147	8
PASSERIFORMES	PARULIDAE		Dendroica petechia	24.86	-108.1	15	5	1970	143778	3
PICIFORMES	PICIDAE		Dryocopus lineatus	25.1033	-108.033	1	6	1904	20348	9
PICIFORMES	PICIDAE		Dryocopus lineatus	25.1033	-108.033	2	6	1904	20349	9
PICIFORMES	PICIDAE		Dryocopus lineatus	25.1033	-108.033	1	6	1904	20350	9
PASSERIFORMES	TYRANNIDAE		Empidonax affinis	24.7967	-107.402	9	6	1934	42664	56
PASSERIFORMES	TYRANNIDAE		Empidonax difficilis	25.08	-108.053	1	5	1934	43506	7
PASSERIFORMES	TYRANNIDAE		Empidonax difficilis	24.7967	-107.402	31	5	1934	43443	56
PASSERIFORMES	TYRANNIDAE		Empidonax difficilis	24.86	-108.1	12	5	1938	43463	3
PASSERIFORMES	TYRANNIDAE		Empidonax difficilis	25.915	-109.165	22	8	1933	43428	10
PASSERIFORMES	TYRANNIDAE		Empidonax difficilis	25.46	-108.078	23	9	1933	43455	51
PASSERIFORMES	TYRANNIDAE		Empidonax traillii	24.81	-107.857	19	5	1934	38541	6
PASSERIFORMES	TYRANNIDAE		Empidonax traillii	24.81	-107.857	21	5	1934	38542	6
PASSERIFORMES	TYRANNIDAE		Empidonax traillii	24.81	-107.857	22	5	1934	38543	6
PASSERIFORMES	TYRANNIDAE		Empidonax traillii	24.81	-107.857	26	5	1934	38544	6
PASSERIFORMES	TYRANNIDAE		Empidonax traillii	24.81	-107.857	15	5	1934	38545	6
PASSERIFORMES	TYRANNIDAE		Empidonax traillii	24.7967	-107.402	29	5	1934	38540	56
PASSERIFORMES	TYRANNIDAE		Empidonax traillii	26.3656	-109.237	16	5	1937	38575	1
PASSERIFORMES	TYRANNIDAE		Empidonax traillii	26.3656	-109.237	15	5	1937	38576	1
PASSERIFORMES	TYRANNIDAE		Empidonax traillii	27.585	-110.005	7	6	1933	38585	29
PASSERIFORMES	TYRANNIDAE		Empidonax traillii	24.7967	-107.402	1	6	1934	38536	56
PASSERIFORMES	TYRANNIDAE		Empidonax traillii	24.7967	-107.402	9	6	1934	38537	56
PASSERIFORMES	TYRANNIDAE		Empidonax traillii	24.7967	-107.402	1	6	1934	38538	56
PASSERIFORMES	TYRANNIDAE		Empidonax traillii	24.7967	-107.402	1	6	1934	38539	56
PASSERIFORMES	TYRANNIDAE		Empidonax traillii	27.585	-109.847	1	6	1952	38577	69
PASSERIFORMES	TYRANNIDAE		Empidonax traillii	25.46	-108.078	22	9	1933	38546	51
PASSERIFORMES	FRINGILLIDAE		Euphonia affinis	24.7967	-107.402	10	9	1935	175000	56
PASSERIFORMES	PARULIDAE		Granatellus venustus	24.81	-107.857	18	5	1934	164560	6
PASSERIFORMES	PARULIDAE		Granatellus venustus	24.81	-107.857	22	5	1934	164561	6
APODIFORMES	TROCHILIDAE		Heliomaster constantii	26.08	-108.758	21	5	1929	267762	40
APODIFORMES	TROCHILIDAE		Heliomaster constantii	24.7967	-107.402	16	6	1934	267727	56
APODIFORMES	TROCHILIDAE		Heliomaster constantii	24.7967	-107.402	14	6	1934	267728	56
APODIFORMES	TROCHILIDAE		Heliomaster constantii	24.7967	-107.402	16	6	1934	267729	56
APODIFORMES	TROCHILIDAE		Heliomaster constantii	24.7967	-107.402	17	6	1934	267730	56
APODIFORMES	TROCHILIDAE		Heliomaster constantii	24.7967	-107.402	16	6	1934	267731	56
APODIFORMES	TROCHILIDAE		Heliomaster constantii	24.7967	-107.402	16	6	1934	267732	56
APODIFORMES	TROCHILIDAE		Heliomaster constantii	24.7967	-107.402	6	6	1934	267733	56
APODIFORMES	TROCHILIDAE		Heliomaster constantii	24.7967	-107.402	16	6	1934	267734	56
APODIFORMES	TROCHILIDAE		Heliomaster constantii	24.7967	-107.402	16	6	1934	267735	56
APODIFORMES	TROCHILIDAE		Heliomaster constantii	24.7967	-107.402	16	6	1934	267736	56
APODIFORMES	TROCHILIDAE		Heliomaster constantii	24.7967	-107.402	17	6	1934	267737	56
APODIFORMES	TROCHILIDAE		Heliomaster constantii	24.7967	-107.402	16	6	1934	267738	56
APODIFORMES	TROCHILIDAE		Heliomaster constantii	24.7967	-107.402	5	6	1934	267739	56
APODIFORMES	TROCHILIDAE		Heliomaster constantii	24.7967	-107.402	16	6	1934	267740	56
APODIFORMES	TROCHILIDAE		Heliomaster constantii	24.7967	-107.402	14	6	1934	267741	56
APODIFORMES	TROCHILIDAE		Heliomaster constantii	24.7967	-107.402	16	6	1934	267742	56
APODIFORMES	TROCHILIDAE		Heliomaster constantii	26.455	-108.552	14	6	1963	267716	135
APODIFORMES	TROCHILIDAE		Heliomaster constantii	26.455	-108.552	15	6	1963	267717	135
APODIFORMES	TROCHILIDAE		Heliomaster constantii	25.46	-108.078	18	9	1933	267744	51
APODIFORMES	TROCHILIDAE		Hylocharis leucotis	26.9917	-108.383	11	7	1936	256645	146
APODIFORMES	TROCHILIDAE		Hylocharis leucotis	26.9917	-108.383	16	7	1936	256649	146
APODIFORMES	TROCHILIDAE		Hylocharis leucotis	26.9917	-108.383	2	7	1936	256651	146
PASSERIFORMES	ICTERIDAE		Icterus bullockii	27.31	-109.3	4	5	1945	239272	106
PASSERIFORMES	ICTERIDAE		Icterus bullockii	27.31	-109.3	4	5	1945	239273	106
PASSERIFORMES	ICTERIDAE		Icterus bullockii	27.9183	-110.898	24	6	1928	239052	4
PASSERIFORMES	ICTERIDAE		Icterus bullockii	27.9183	-110.898	24	6	1928	239053	4
PASSERIFORMES	ICTERIDAE		Icterus cucullatus	27.5167	-109.25	2	5	1888	233278	199
PASSERIFORMES	ICTERIDAE		Icterus cucullatus	26.35	-109.133	18	5	1937	233591	8
PASSERIFORMES	ICTERIDAE		Icterus cucullatus	26.35	-109.133	19	5	1937	233594	8
PASSERIFORMES	ICTERIDAE		Icterus cucullatus	27.9183	-110.898	15	6	1928	233273	4
PASSERIFORMES	ICTERIDAE		Icterus cucullatus	27.9183	-110.898	22	6	1928	233274	4
PASSERIFORMES	ICTERIDAE		Icterus cucullatus	26.35	-109.133	9	6	1930	233592	8
PASSERIFORMES	ICTERIDAE		Icterus cucullatus	26.35	-109.133	9	6	1930	233593	8
PASSERIFORMES	ICTERIDAE		Icterus pustulatus	25.1033	-108.033	6	6	1904	234826	9
PASSERIFORMES	ICTERIDAE		Icterus pustulatus	25.1033	-108.033	2	6	1904	235693	9
PASSERIFORMES	ICTERIDAE		Icterus pustulatus	25.1033	-108.033	4	6	1904	235694	9
PASSERIFORMES	ICTERIDAE		Icterus pustulatus	25.1033	-108.033	1	6	1904	235695	9
PASSERIFORMES	ICTERIDAE		Icterus pustulatus	25.1033	-108.033	4	6	1904	235696	9
PASSERIFORMES	ICTERIDAE		Icterus pustulatus	25.1033	-108.033	6	6	1904	235697	9
PASSERIFORMES	ICTERIDAE		Icterus pustulatus	25.1033	-108.033	5	6	1904	235698	9
PASSERIFORMES	ICTERIDAE		Icterus pustulatus	25.1033	-108.033	2	6	1904	235699	9
PASSERIFORMES	ICTERIDAE		Icterus pustulatus	25.1033	-108.033	2	6	1904	235700	9
PASSERIFORMES	ICTERIDAE		Icterus pustulatus	25.1033	-108.033	5	6	1904	235701	9
PASSERIFORMES	ICTERIDAE		Icterus pustulatus	25.1033	-108.033	1	6	1904	235702	9
PASSERIFORMES	ICTERIDAE		Icterus pustulatus	25.1033	-108.033	3	6	1904	235703	9
PASSERIFORMES	ICTERIDAE		Icterus pustulatus	25.1033	-108.033	1	6	1904	235704	9
PASSERIFORMES	ICTERIDAE		Icterus pustulatus	25.1033	-108.033	3	6	1904	235705	9
PASSERIFORMES	ICTERIDAE		Icterus pustulatus	25.1033	-108.033	2	6	1904	235706	9
PASSERIFORMES	ICTERIDAE		Icterus pustulatus	26.455	-108.552	13	6	1963	235591	135
PASSERIFORMES	ICTERIDAE		Icterus pustulatus	26.455	-108.552	14	6	1963	235592	135
PASSERIFORMES	ICTERIDAE		Icterus pustulatus	26.455	-108.552	12	6	1963	235593	135
PASSERIFORMES	ICTERIDAE		Icterus pustulatus	25.715	-108.98	7	7	1895	235707	10
PASSERIFORMES	ICTERIDAE		Icterus wagleri	26.35	-109.133	9	6	1930	232007	8
PASSERIFORMES	ICTERIDAE		Icterus wagleri	26.35	-109.133	9	6	1930	232008	8
PASSERIFORMES	DENDROCOLAPTIDAE		Lepidocolaptes leucogaster	26.9917	-108.383	24	6	1936	26701	146
PASSERIFORMES	DENDROCOLAPTIDAE		Lepidocolaptes leucogaster	26.9917	-108.383	11	7	1936	26693	146
PASSERIFORMES	DENDROCOLAPTIDAE		Lepidocolaptes leucogaster	26.9917	-108.383	18	7	1936	26695	146
PASSERIFORMES	DENDROCOLAPTIDAE		Lepidocolaptes leucogaster	26.9917	-108.383	15	7	1936	26696	146
PASSERIFORMES	DENDROCOLAPTIDAE		Lepidocolaptes leucogaster	26.9917	-108.383	9	7	1936	26697	146
PASSERIFORMES	DENDROCOLAPTIDAE		Lepidocolaptes leucogaster	26.9917	-108.383	12	7	1936	26700	146
PASSERIFORMES	DENDROCOLAPTIDAE		Lepidocolaptes leucogaster	26.9917	-108.383	14	7	1936	26703	146
PICIFORMES	PICIDAE		Melanerpes chrysogenys	25.1033	-108.033	1	6	1904	8272	9
PICIFORMES	PICIDAE		Melanerpes formicivorus	26.9917	-108.383	29	6	1936	6822	146
PICIFORMES	PICIDAE		Melanerpes formicivorus	26.9917	-108.383	29	6	1936	6826	146
PICIFORMES	PICIDAE		Melanerpes formicivorus	26.9917	-108.383	99	7	1936	6818	146
PICIFORMES	PICIDAE		Melanerpes formicivorus	26.9917	-108.383	8	7	1936	6819	146
PICIFORMES	PICIDAE		Melanerpes formicivorus	26.9917	-108.383	3	7	1936	6820	146
PICIFORMES	PICIDAE		Melanerpes formicivorus	26.9917	-108.383	12	7	1936	6821	146
PICIFORMES	PICIDAE		Melanerpes formicivorus	26.9917	-108.383	3	7	1936	6823	146
PICIFORMES	PICIDAE		Melanerpes formicivorus	26.9917	-108.383	3	7	1936	6824	146
PICIFORMES	PICIDAE		Melanerpes formicivorus	26.9917	-108.383	15	7	1936	6825	146
PICIFORMES	PICIDAE		Melanerpes formicivorus	26.9917	-108.383	12	7	1936	6827	146
PICIFORMES	PICIDAE		Melanerpes hypopolius	27.1183	-109.932	16	7	1963	8556	9
PICIFORMES	PICIDAE		Melanerpes uropygialis	26.415	-108.622	12	5	1933	9767	78
PICIFORMES	PICIDAE		Melanerpes uropygialis	26.35	-109.133	14	5	1937	9877	8
PICIFORMES	PICIDAE		Melanerpes uropygialis	25.9667	-109.292	10	5	1947	9791	6
PICIFORMES	PICIDAE		Melanerpes uropygialis	25.9667	-109.292	17	5	1947	9792	6
PICIFORMES	PICIDAE		Melanerpes uropygialis	25.1033	-108.033	8	6	1904	9797	9
PICIFORMES	PICIDAE		Melanerpes uropygialis	24.7967	-107.402	4	6	1934	9763	56
PICIFORMES	PICIDAE		Melanerpes uropygialis	27.5483	-109.95	2	6	1954	9858	33
PICIFORMES	PICIDAE		Melanerpes uropygialis	27.5483	-109.95	2	6	1954	9859	33
PICIFORMES	PICIDAE		Melanerpes uropygialis	24.9917	-107.395	20	6	1955	9729	80
PICIFORMES	PICIDAE		Melanerpes uropygialis	24.9917	-107.395	20	6	1955	9730	80
PICIFORMES	PICIDAE		Melanerpes uropygialis	26.455	-108.552	13	6	1963	9737	135
PICIFORMES	PICIDAE		Melanerpes uropygialis	26.455	-108.552	14	6	1963	9739	135
PICIFORMES	PICIDAE		Melanerpes uropygialis	27.9183	-110.898	2	7	1932	9060	4
PICIFORMES	PICIDAE		Melanerpes uropygialis	26.2517	-108.685	25	7	1959	9731	87
PICIFORMES	PICIDAE		Melanerpes uropygialis	26.2517	-108.685	25	7	1959	9732	87
PICIFORMES	PICIDAE		Melanerpes uropygialis	26.2517	-108.685	25	7	1959	9733	87
PICIFORMES	PICIDAE		Melanerpes uropygialis	27.1183	-109.932	16	7	1963	9083	9
PICIFORMES	PICIDAE		Melanerpes uropygialis	25.915	-109.165	8	8	1933	9742	10
PASSERIFORMES	MIMIDAE		Melanotis caerulescens	25.715	-108.98	7	5	1895	134794	10
PASSERIFORMES	MIMIDAE		Melanotis caerulescens	24.81	-107.857	21	5	1934	134799	6
PASSERIFORMES	MIMIDAE		Melanotis caerulescens	25.1033	-108.033	3	6	1904	134793	9
PASSERIFORMES	MIMIDAE		Melanotis caerulescens	26.9917	-108.383	21	6	1936	134763	146
PASSERIFORMES	MIMIDAE		Melanotis caerulescens	25.715	-108.98	7	7	1895	134795	10
PASSERIFORMES	TYRANNIDAE		Mitrephanes phaeocercus	26.9917	-108.383	30	6	1936	34893	146
PASSERIFORMES	TYRANNIDAE		Mitrephanes phaeocercus	26.9917	-108.383	26	6	1936	34895	146
PASSERIFORMES	TYRANNIDAE		Mitrephanes phaeocercus	26.9917	-108.383	26	6	1936	34904	146
PASSERIFORMES	TYRANNIDAE		Mitrephanes phaeocercus	26.9917	-108.383	14	7	1936	34894	146
PASSERIFORMES	TYRANNIDAE		Mitrephanes phaeocercus	26.9917	-108.383	6	7	1936	34897	146
PASSERIFORMES	TYRANNIDAE		Mitrephanes phaeocercus	26.9917	-108.383	12	7	1936	34899	146
PASSERIFORMES	TYRANNIDAE		Mitrephanes phaeocercus	26.9917	-108.383	8	7	1936	34900	146
PASSERIFORMES	TYRANNIDAE		Mitrephanes phaeocercus	26.9917	-108.383	5	7	1936	34901	146
PASSERIFORMES	TYRANNIDAE		Mitrephanes phaeocercus	26.9917	-108.383	16	7	1936	34902	146
PASSERIFORMES	TYRANNIDAE		Mitrephanes phaeocercus	26.9917	-108.383	12	7	1936	34905	146
PASSERIFORMES	ICTERIDAE		Molothrus aeneus	26.65	-108.467	29	5	1888	229326	189
PASSERIFORMES	ICTERIDAE		Molothrus aeneus	26.415	-108.622	15	5	1933	229903	78
PASSERIFORMES	ICTERIDAE		Molothrus aeneus	26.415	-108.622	14	5	1933	229904	78
PASSERIFORMES	ICTERIDAE		Molothrus aeneus	24.81	-107.857	21	5	1934	229905	6
PASSERIFORMES	ICTERIDAE		Molothrus aeneus	24.81	-107.857	21	5	1934	229907	6
PASSERIFORMES	ICTERIDAE		Molothrus aeneus	24.81	-107.857	27	5	1934	229910	6
PASSERIFORMES	ICTERIDAE		Molothrus aeneus	24.81	-107.857	20	5	1934	229911	6
PASSERIFORMES	ICTERIDAE		Molothrus aeneus	24.81	-107.857	15	5	1934	230243	6
PASSERIFORMES	ICTERIDAE		Molothrus aeneus	24.7967	-107.402	31	5	1934	229902	56
PASSERIFORMES	ICTERIDAE		Molothrus aeneus	25.1033	-108.033	1	6	1904	229928	9
PASSERIFORMES	ICTERIDAE		Molothrus aeneus	25.1033	-108.033	2	6	1904	229929	9
PASSERIFORMES	ICTERIDAE		Molothrus aeneus	27.9183	-110.898	28	6	1928	229264	4
PASSERIFORMES	ICTERIDAE		Molothrus aeneus	27.4967	-109.947	6	6	1933	230016	33
PASSERIFORMES	ICTERIDAE		Molothrus aeneus	24.7967	-107.402	10	6	1934	229900	56
PASSERIFORMES	ICTERIDAE		Molothrus aeneus	24.7967	-107.402	4	6	1934	229901	56
PASSERIFORMES	ICTERIDAE		Molothrus aeneus	26.455	-108.552	13	6	1963	230209	135
PASSERIFORMES	ICTERIDAE		Molothrus aeneus	26.455	-108.552	13	6	1963	230210	135
PASSERIFORMES	ICTERIDAE		Molothrus aeneus	27.5483	-109.95	2	7	1954	230012	33
PASSERIFORMES	ICTERIDAE		Molothrus aeneus	25.915	-109.165	10	8	1933	229893	10
PASSERIFORMES	ICTERIDAE		Molothrus aeneus	25.915	-109.165	10	8	1933	229894	10
PASSERIFORMES	ICTERIDAE		Molothrus aeneus	25.46	-108.078	25	9	1933	229926	51
PASSERIFORMES	ICTERIDAE		Molothrus ater	26.415	-108.622	15	5	1933	231057	78
PASSERIFORMES	ICTERIDAE		Molothrus ater	26.415	-108.622	15	5	1933	231058	78
PASSERIFORMES	ICTERIDAE		Molothrus ater	26.415	-108.622	15	5	1933	231059	78
PASSERIFORMES	ICTERIDAE		Molothrus ater	27.9183	-110.898	23	6	1928	230534	4
PASSERIFORMES	ICTERIDAE		Molothrus ater	27.9183	-110.898	28	6	1928	230535	4
PASSERIFORMES	ICTERIDAE		Molothrus ater	27.9183	-110.898	23	6	1928	230536	4
PASSERIFORMES	ICTERIDAE		Molothrus ater	26.455	-108.552	12	6	1963	231212	135
PASSERIFORMES	ICTERIDAE		Molothrus ater	25.915	-109.165	9	8	1933	231054	10
PASSERIFORMES	ICTERIDAE		Molothrus ater	25.915	-109.165	9	9	1933	231055	10
PASSERIFORMES	ICTERIDAE		Molothrus ater	25.915	-109.165	9	9	1933	231056	10
PASSERIFORMES	TURDIDAE		Myadestes occidentalis	26.9917	-108.383	19	6	1936	116375	146
PASSERIFORMES	TURDIDAE		Myadestes occidentalis	26.9917	-108.383	24	6	1936	116378	146
PASSERIFORMES	TURDIDAE		Myadestes occidentalis	26.9917	-108.383	19	6	1936	116379	146
PASSERIFORMES	TURDIDAE		Myadestes occidentalis	26.9917	-108.383	14	6	1936	116382	146
PASSERIFORMES	TURDIDAE		Myadestes occidentalis	26.9917	-108.383	20	6	1936	116383	146
PASSERIFORMES	TURDIDAE		Myadestes occidentalis	26.9917	-108.383	5	7	1936	116374	146
PASSERIFORMES	TURDIDAE		Myadestes occidentalis	26.9917	-108.383	12	7	1936	116376	146
PASSERIFORMES	TURDIDAE		Myadestes occidentalis	26.9917	-108.383	12	7	1936	116380	146
PASSERIFORMES	TURDIDAE		Myadestes occidentalis	26.9917	-108.383	7	7	1936	116381	146
PASSERIFORMES	TURDIDAE		Myadestes occidentalis	26.9917	-108.383	9	7	1936	116384	146
PASSERIFORMES	TYRANNIDAE		Myiarchus cinerascens	27.9183	-110.898	18	5	1905	52605	4
PASSERIFORMES	TYRANNIDAE		Myiarchus cinerascens	27.9183	-110.898	14	5	1905	52606	4
PASSERIFORMES	TYRANNIDAE		Myiarchus cinerascens	26.3817	-108.473	6	6	1888	51328	197
PASSERIFORMES	TYRANNIDAE		Myiarchus cinerascens	27.9183	-110.898	25	6	1928	51263	4
PASSERIFORMES	TYRANNIDAE		Myiarchus cinerascens	26.455	-108.552	16	6	1963	52466	135
PASSERIFORMES	TYRANNIDAE		Myiarchus cinerascens	26.455	-108.552	16	6	1963	52467	135
PASSERIFORMES	TYRANNIDAE		Myiarchus cinerascens	26.455	-108.552	16	6	1963	52468	135
PASSERIFORMES	TYRANNIDAE		Myiarchus cinerascens	26.455	-108.552	16	6	1963	52469	135
PASSERIFORMES	TYRANNIDAE		Myiarchus cinerascens	25.915	-109.165	2	9	1933	52472	10
PASSERIFORMES	TYRANNIDAE		Myiarchus nuttingi	26.415	-108.622	11	5	1933	53512	78
PASSERIFORMES	TYRANNIDAE		Myiarchus nuttingi	24.81	-107.857	21	5	1934	53513	6
PASSERIFORMES	TYRANNIDAE		Myiarchus nuttingi	25.08	-108.053	6	5	1934	53557	7
PASSERIFORMES	TYRANNIDAE		Myiarchus nuttingi	26.35	-109.133	2	5	1947	53597	8
PASSERIFORMES	TYRANNIDAE		Myiarchus nuttingi	26.3817	-108.473	6	6	1888	53073	197
PASSERIFORMES	TYRANNIDAE		Myiarchus nuttingi	26.455	-108.552	16	6	1963	53494	135
PASSERIFORMES	TYRANNIDAE		Myiarchus nuttingi	26.455	-108.552	16	6	1963	53495	135
PASSERIFORMES	TYRANNIDAE		Myiarchus tuberculifer	26.415	-108.622	12	5	1933	50316	78
PASSERIFORMES	TYRANNIDAE		Myiarchus tuberculifer	24.81	-107.857	16	5	1934	50323	6
PASSERIFORMES	TYRANNIDAE		Myiarchus tuberculifer	25.08	-108.053	5	5	1934	50372	7
PASSERIFORMES	TYRANNIDAE		Myiarchus tuberculifer	24.7967	-107.402	29	5	1934	50306	56
PASSERIFORMES	TYRANNIDAE		Myiarchus tuberculifer	26.35	-109.133	2	5	1947	50435	8
PASSERIFORMES	TYRANNIDAE		Myiarchus tuberculifer	26.35	-109.133	9	6	1930	50436	8
PASSERIFORMES	TYRANNIDAE		Myiarchus tuberculifer	27.15	-109.4	28	6	1930	50519	42
PASSERIFORMES	TYRANNIDAE		Myiarchus tuberculifer	24.7967	-107.402	6	6	1934	50311	56
PASSERIFORMES	TYRANNIDAE		Myiarchus tuberculifer	24.7967	-107.402	1	6	1934	50312	56
PASSERIFORMES	TYRANNIDAE		Myiarchus tuberculifer	24.7967	-107.402	12	6	1934	50313	56
PASSERIFORMES	TYRANNIDAE		Myiarchus tuberculifer	24.7967	-107.402	15	6	1934	50315	56
PASSERIFORMES	TYRANNIDAE		Myiarchus tuberculifer	26.9917	-108.383	20	6	1936	50269	146
PASSERIFORMES	TYRANNIDAE		Myiarchus tuberculifer	26.9917	-108.383	26	6	1936	50275	146
PASSERIFORMES	TYRANNIDAE		Myiarchus tuberculifer	26.9917	-108.383	21	6	1936	50278	146
PASSERIFORMES	TYRANNIDAE		Myiarchus tuberculifer	26.455	-108.552	16	6	1962	50262	135
PASSERIFORMES	TYRANNIDAE		Myiarchus tuberculifer	26.455	-108.552	16	6	1963	50263	135
PASSERIFORMES	TYRANNIDAE		Myiarchus tuberculifer	26.9917	-108.383	7	7	1936	50270	146
PASSERIFORMES	TYRANNIDAE		Myiarchus tuberculifer	26.9917	-108.383	17	7	1936	50271	146
PASSERIFORMES	TYRANNIDAE		Myiarchus tuberculifer	26.9917	-108.383	11	7	1936	50272	146
PASSERIFORMES	TYRANNIDAE		Myiarchus tuberculifer	26.9917	-108.383	5	7	1936	50273	146
PASSERIFORMES	TYRANNIDAE		Myiarchus tuberculifer	26.9917	-108.383	11	7	1936	50274	146
PASSERIFORMES	TYRANNIDAE		Myiarchus tuberculifer	26.9917	-108.383	1	7	1936	50276	146
PASSERIFORMES	TYRANNIDAE		Myiarchus tuberculifer	26.9917	-108.383	1	7	1936	50277	146
PASSERIFORMES	TYRANNIDAE		Myiarchus tuberculifer	26.9917	-108.383	16	7	1936	50279	146
PASSERIFORMES	TYRANNIDAE		Myiarchus tuberculifer	25.915	-109.165	7	8	1933	50265	10
PASSERIFORMES	TYRANNIDAE		Myiarchus tuberculifer	25.915	-109.165	99	8	1933	50266	10
PASSERIFORMES	TYRANNIDAE		Myiarchus tuberculifer	27.6067	-109.935	20	9	1954	50429	37
PASSERIFORMES	TYRANNIDAE		Myiarchus tuberculifer	27.6067	-109.935	23	9	1954	50430	37
PASSERIFORMES	TYRANNIDAE		Myiarchus tuberculifer	27.6067	-109.935	23	9	1954	50431	37
PASSERIFORMES	PARULIDAE		Myioborus miniatus	26.9917	-108.383	27	6	1936	159012	146
PASSERIFORMES	PARULIDAE		Myioborus miniatus	26.9917	-108.383	30	6	1936	159014	146
PASSERIFORMES	PARULIDAE		Myioborus miniatus	26.9917	-108.383	20	6	1936	159015	146
PASSERIFORMES	PARULIDAE		Myioborus miniatus	26.9917	-108.383	30	6	1936	159017	146
PASSERIFORMES	PARULIDAE		Myioborus miniatus	26.9917	-108.383	22	6	1936	159018	146
PASSERIFORMES	PARULIDAE		Myioborus miniatus	26.9917	-108.383	22	6	1936	159019	146
PASSERIFORMES	PARULIDAE		Myioborus miniatus	26.9917	-108.383	28	6	1936	159021	146
PASSERIFORMES	PARULIDAE		Myioborus miniatus	26.9917	-108.383	12	7	1936	159013	146
PASSERIFORMES	PARULIDAE		Myioborus miniatus	26.9917	-108.383	8	7	1936	159016	146
PASSERIFORMES	PARULIDAE		Myioborus miniatus	26.9917	-108.383	15	7	1936	159020	146
PASSERIFORMES	PARULIDAE		Parula pitiayumi	24.0217	-106.972	27	7	1961	140716	20
PASSERIFORMES	PARULIDAE		Parula superciliosa	26.9917	-108.383	27	6	1936	141505	146
PASSERIFORMES	PARULIDAE		Parula superciliosa	26.9917	-108.383	21	6	1936	141506	146
PASSERIFORMES	EMBERIZIDAE		Passerculus sandwichensis	27.09	-109.918	1	5	1930	202190	5
PASSERIFORMES	EMBERIZIDAE		Passerculus sandwichensis	27.09	-109.918	1	5	1930	202193	5
PASSERIFORMES	EMBERIZIDAE		Passerculus sandwichensis	27.09	-109.918	1	5	1930	202194	5
PASSERIFORMES	EMBERIZIDAE		Passerculus sandwichensis	27.09	-109.918	1	5	1930	202195	5
PASSERIFORMES	EMBERIZIDAE		Passerculus sandwichensis	27.09	-109.918	1	5	1930	202196	5
PASSERIFORMES	EMBERIZIDAE		Passerculus sandwichensis	27.09	-109.918	1	5	1930	202197	5
PASSERIFORMES	EMBERIZIDAE		Passerculus sandwichensis	27.09	-109.918	1	5	1930	202198	5
PASSERIFORMES	EMBERIZIDAE		Passerculus sandwichensis	27.09	-109.918	1	5	1930	202199	5
PASSERIFORMES	EMBERIZIDAE		Passerculus sandwichensis	27.8989	-110.588	12	5	1930	202239	90
PASSERIFORMES	EMBERIZIDAE		Passerculus sandwichensis	27.8989	-110.588	12	5	1930	202240	90
PASSERIFORMES	EMBERIZIDAE		Passerculus sandwichensis	27.8989	-110.588	12	5	1930	202241	90
PASSERIFORMES	EMBERIZIDAE		Passerculus sandwichensis	27.8989	-110.588	12	5	1930	203228	90
PASSERIFORMES	EMBERIZIDAE		Passerculus sandwichensis	27.8989	-110.588	12	5	1930	203229	90
PASSERIFORMES	EMBERIZIDAE		Passerculus sandwichensis	24.81	-107.857	22	5	1934	202119	6
PASSERIFORMES	EMBERIZIDAE		Passerculus sandwichensis	24.81	-107.857	22	5	1934	202120	6
PASSERIFORMES	EMBERIZIDAE		Passerculus sandwichensis	26.35	-109.133	18	5	1937	202170	8
PASSERIFORMES	EMBERIZIDAE		Passerculus sandwichensis	26.35	-109.133	18	5	1937	202174	8
PASSERIFORMES	EMBERIZIDAE		Passerculus sandwichensis	26.35	-109.133	18	5	1937	202175	8
PASSERIFORMES	EMBERIZIDAE		Passerculus sandwichensis	27.2067	-109.522	18	5	1937	203198	71
PASSERIFORMES	EMBERIZIDAE		Passerculus sandwichensis	26.35	-109.133	2	5	1947	202173	8
PASSERIFORMES	EMBERIZIDAE		Passerculus sandwichensis	27.2067	-109.522	1	5	1947	203197	71
PASSERIFORMES	EMBERIZIDAE		Passerculus sandwichensis	24.4967	-107.65	16	5	1971	203120	3
PASSERIFORMES	EMBERIZIDAE		Passerculus sandwichensis	24.4967	-107.65	16	5	1971	203121	3
PASSERIFORMES	EMBERIZIDAE		Passerculus sandwichensis	24.4967	-107.65	16	5	1971	203122	3
PASSERIFORMES	EMBERIZIDAE		Passerculus sandwichensis	24.4967	-107.65	16	5	1971	203123	3
PASSERIFORMES	EMBERIZIDAE		Passerculus sandwichensis	24.4967	-107.65	16	5	1971	203124	3
PASSERIFORMES	EMBERIZIDAE		Passerculus sandwichensis	24.4967	-107.65	16	5	1971	203125	3
PASSERIFORMES	EMBERIZIDAE		Passerculus sandwichensis	24.4967	-107.65	16	5	1971	203126	3
PASSERIFORMES	EMBERIZIDAE		Passerculus sandwichensis	24.4967	-107.65	16	5	1971	203127	3
PASSERIFORMES	EMBERIZIDAE		Passerculus sandwichensis	24.4967	-107.65	16	5	1971	203128	3
PASSERIFORMES	EMBERIZIDAE		Passerculus sandwichensis	24.4967	-107.65	16	5	1971	203129	3
PASSERIFORMES	EMBERIZIDAE		Passerculus sandwichensis	24.4967	-107.65	16	5	1971	203130	3
PASSERIFORMES	EMBERIZIDAE		Passerculus sandwichensis	24.4967	-107.65	16	5	1971	203131	3
PASSERIFORMES	EMBERIZIDAE		Passerculus sandwichensis	24.4967	-107.65	16	5	1971	203132	3
PASSERIFORMES	EMBERIZIDAE		Passerculus sandwichensis	24.4967	-107.65	16	5	1971	203133	3
PASSERIFORMES	EMBERIZIDAE		Passerculus sandwichensis	24.4967	-107.65	16	5	1971	203134	3
PASSERIFORMES	EMBERIZIDAE		Passerculus sandwichensis	24.4967	-107.65	16	5	1971	203135	3
PASSERIFORMES	EMBERIZIDAE		Passerculus sandwichensis	24.4967	-107.65	16	5	1971	203136	3
PASSERIFORMES	EMBERIZIDAE		Passerculus sandwichensis	24.4967	-107.65	16	5	1971	203137	3
PASSERIFORMES	EMBERIZIDAE		Passerculus sandwichensis	24.4967	-107.65	16	5	1971	203138	3
PASSERIFORMES	EMBERIZIDAE		Passerculus sandwichensis	24.4967	-107.65	16	5	1971	203139	3
PASSERIFORMES	EMBERIZIDAE		Passerculus sandwichensis	24.4967	-107.65	16	5	1971	203140	3
PASSERIFORMES	EMBERIZIDAE		Passerculus sandwichensis	24.4967	-107.65	16	5	1971	203141	3
PASSERIFORMES	EMBERIZIDAE		Passerculus sandwichensis	24.4967	-107.65	16	5	1971	203142	3
PASSERIFORMES	EMBERIZIDAE		Passerculus sandwichensis	24.4967	-107.65	16	5	1971	203143	3
PASSERIFORMES	EMBERIZIDAE		Passerculus sandwichensis	26.3667	-109.143	8	6	1930	203218	7
PASSERIFORMES	CARDINALIDAE		Passerina amoena	25.915	-109.165	3	9	1933	219022	10
PASSERIFORMES	CARDINALIDAE		Passerina ciris	25.915	-109.165	15	8	1933	222933	10
PASSERIFORMES	CARDINALIDAE		Passerina ciris	25.915	-109.165	10	8	1933	222934	10
PASSERIFORMES	CARDINALIDAE		Passerina ciris	25.915	-109.165	10	8	1933	222935	10
PASSERIFORMES	CARDINALIDAE		Passerina ciris	25.915	-109.165	16	8	1933	222936	10
PASSERIFORMES	CARDINALIDAE		Passerina ciris	25.915	-109.165	23	8	1933	222937	10
PASSERIFORMES	CARDINALIDAE		Passerina ciris	25.915	-109.165	23	8	1933	222938	10
PASSERIFORMES	CARDINALIDAE		Passerina ciris	25.915	-109.165	29	8	1933	222939	10
PASSERIFORMES	CARDINALIDAE		Passerina ciris	25.915	-109.165	16	8	1933	222940	10
PASSERIFORMES	CARDINALIDAE		Passerina ciris	25.915	-109.165	12	8	1933	222941	10
PASSERIFORMES	CARDINALIDAE		Passerina ciris	25.915	-109.165	8	9	1933	222942	10
PASSERIFORMES	CARDINALIDAE		Passerina ciris	25.46	-108.078	25	9	1933	222969	51
PASSERIFORMES	CARDINALIDAE		Passerina ciris	25.46	-108.078	22	9	1933	222970	51
PASSERIFORMES	CARDINALIDAE		Passerina ciris	25.46	-108.078	29	9	1933	222972	51
PASSERIFORMES	CARDINALIDAE		Passerina ciris	25.46	-108.078	29	9	1933	222973	51
PASSERIFORMES	CARDINALIDAE		Passerina ciris	25.46	-108.078	29	9	1933	222974	51
PASSERIFORMES	CARDINALIDAE		Passerina ciris	24.7967	-107.402	28	9	1937	222958	56
PASSERIFORMES	CARDINALIDAE		Passerina ciris	27.6067	-109.935	18	9	1954	223006	37
PASSERIFORMES	PEUCEDRAMIDAE		Peucedramus taeniatus	26.9917	-108.383	3	7	1936	137678	146
PASSERIFORMES	PEUCEDRAMIDAE		Peucedramus taeniatus	26.9917	-108.383	2	7	1936	137679	146
PASSERIFORMES	PEUCEDRAMIDAE		Peucedramus taeniatus	26.9917	-108.383	9	7	1936	137683	146
PASSERIFORMES	PEUCEDRAMIDAE		Peucedramus taeniatus	26.9917	-108.383	2	7	1936	137688	146
PASSERIFORMES	PEUCEDRAMIDAE		Peucedramus taeniatus	26.9917	-108.383	10	7	1936	137692	146
PASSERIFORMES	PEUCEDRAMIDAE		Peucedramus taeniatus	26.9917	-108.383	2	7	1936	137694	146
PASSERIFORMES	PTILOGONATIDAE		Phainopepla nitens	27.5483	-109.95	2	6	1954	137012	33
PASSERIFORMES	PTILOGONATIDAE		Phainopepla nitens	27.9183	-110.898	29	7	1905	137050	4
PASSERIFORMES	CARDINALIDAE		Pheucticus chrysopeplus	25.1033	-108.033	5	6	1904	214159	9
PASSERIFORMES	CARDINALIDAE		Pheucticus chrysopeplus	25.1033	-108.033	1	6	1904	214160	9
PASSERIFORMES	CARDINALIDAE		Pheucticus chrysopeplus	25.1033	-108.033	3	6	1904	214161	9
PASSERIFORMES	CARDINALIDAE		Pheucticus chrysopeplus	25.1033	-108.033	4	6	1904	214162	9
PASSERIFORMES	CARDINALIDAE		Pheucticus chrysopeplus	25.1033	-108.033	6	6	1904	214163	9
PASSERIFORMES	CARDINALIDAE		Pheucticus chrysopeplus	25.1033	-108.033	2	6	1904	214164	9
PASSERIFORMES	CARDINALIDAE		Pheucticus chrysopeplus	25.1033	-108.033	1	6	1904	214165	9
PASSERIFORMES	CARDINALIDAE		Pheucticus chrysopeplus	25.1033	-108.033	5	6	1904	214166	9
PASSERIFORMES	CARDINALIDAE		Pheucticus chrysopeplus	25.1033	-108.033	5	6	1904	214167	9
PASSERIFORMES	CARDINALIDAE		Pheucticus chrysopeplus	25.1033	-108.033	6	6	1904	214168	9
PASSERIFORMES	CARDINALIDAE		Pheucticus chrysopeplus	26.455	-108.552	16	6	1963	214125	135
PASSERIFORMES	CARDINALIDAE		Pheucticus chrysopeplus	26.455	-108.552	14	6	1963	214126	135
PASSERIFORMES	CARDINALIDAE		Pheucticus melanocephalus	26.9917	-108.383	21	6	1936	215680	146
PASSERIFORMES	CARDINALIDAE		Pheucticus melanocephalus	26.9917	-108.383	29	6	1936	215681	146
PASSERIFORMES	CARDINALIDAE		Pheucticus melanocephalus	26.9917	-108.383	21	6	1936	215682	146
PASSERIFORMES	CARDINALIDAE		Pheucticus melanocephalus	26.9917	-108.383	29	6	1936	215685	146
PASSERIFORMES	CARDINALIDAE		Pheucticus melanocephalus	26.9917	-108.383	19	6	1936	215687	146
PASSERIFORMES	CARDINALIDAE		Pheucticus melanocephalus	26.9917	-108.383	26	6	1936	215688	146
PASSERIFORMES	CARDINALIDAE		Pheucticus melanocephalus	27.15	-109.4	25	7	1929	214924	42
PASSERIFORMES	CARDINALIDAE		Pheucticus melanocephalus	26.9917	-108.383	9	7	1936	215683	146
PASSERIFORMES	CARDINALIDAE		Pheucticus melanocephalus	26.9917	-108.383	8	7	1936	215684	146
PASSERIFORMES	CARDINALIDAE		Pheucticus melanocephalus	26.9917	-108.383	2	7	1936	215686	146
PASSERIFORMES	CARDINALIDAE		Pheucticus melanocephalus	26.9917	-108.383	9	7	1936	215689	146
PASSERIFORMES	CARDINALIDAE		Pheucticus melanocephalus	26.9917	-108.383	4	7	1936	215690	146
PASSERIFORMES	CARDINALIDAE		Pheucticus melanocephalus	26.9917	-108.383	9	7	1936	215692	146
PASSERIFORMES	CARDINALIDAE		Pheucticus melanocephalus	26.7667	-108.897	5	8	1971	215937	193
PASSERIFORMES	CARDINALIDAE		Pheucticus melanocephalus	27.6067	-109.935	28	9	1954	215811	37
CUCULIFORMES	CUCULIDAE		Piaya cayana	25.715	-108.98	11	6	1895	1674	10
CUCULIFORMES	CUCULIDAE		Piaya cayana	26.0667	-108.677	14	7	1956	1635	119
PICIFORMES	PICIDAE		Picoides scalaris	24.81	-107.857	16	5	1934	14482	6
PICIFORMES	PICIDAE		Picoides scalaris	25.08	-108.053	5	5	1934	14521	7
PICIFORMES	PICIDAE		Picoides scalaris	24.7967	-107.402	17	6	1934	14469	56
PICIFORMES	PICIDAE		Picoides scalaris	24.7967	-107.402	13	6	1934	14472	56
PICIFORMES	PICIDAE		Picoides scalaris	24.7967	-107.402	3	6	1934	14475	56
PICIFORMES	PICIDAE		Picoides scalaris	26.455	-108.552	13	6	1963	14441	135
PICIFORMES	PICIDAE		Picoides scalaris	25.915	-109.165	5	8	1933	14442	10
PICIFORMES	PICIDAE		Picoides stricklandi	26.9917	-108.383	27	6	1936	16808	146
PICIFORMES	PICIDAE		Picoides stricklandi	26.9917	-108.383	25	6	1936	16809	146
PICIFORMES	PICIDAE		Picoides stricklandi	26.9917	-108.383	23	6	1936	16815	146
PICIFORMES	PICIDAE		Picoides stricklandi	26.9917	-108.383	1	7	1936	16807	146
PICIFORMES	PICIDAE		Picoides stricklandi	26.9917	-108.383	17	7	1936	16811	146
PICIFORMES	PICIDAE		Picoides stricklandi	26.9917	-108.383	17	7	1936	16812	146
PICIFORMES	PICIDAE		Picoides stricklandi	26.9917	-108.383	11	7	1936	16814	146
PICIFORMES	PICIDAE		Piculus auricularis	26.9917	-108.383	12	7	1936	18035	146
PICIFORMES	PICIDAE		Piculus auricularis	26.9917	-108.383	12	7	1936	18036	146
PASSERIFORMES	EMBERIZIDAE		Pipilo chlorurus	26.415	-108.622	14	5	1933	186769	78
PASSERIFORMES	EMBERIZIDAE		Pipilo chlorurus	24.81	-107.857	16	5	1934	186770	6
PASSERIFORMES	EMBERIZIDAE		Pipilo chlorurus	25.46	-108.072	28	9	1933	186766	56
PASSERIFORMES	THRAUPIDAE		Piranga bidentata	26.9917	-108.383	24	6	1936	172417	146
PASSERIFORMES	THRAUPIDAE		Piranga bidentata	26.9917	-108.383	5	7	1936	172415	146
PASSERIFORMES	THRAUPIDAE		Piranga bidentata	26.9917	-108.383	6	7	1936	172416	146
PASSERIFORMES	THRAUPIDAE		Piranga erythrocephala	26.9917	-108.383	23	6	1936	173270	146
PASSERIFORMES	THRAUPIDAE		Piranga flava	26.9917	-108.383	22	6	1936	170149	146
PASSERIFORMES	THRAUPIDAE		Piranga flava	26.9917	-108.383	27	6	1936	170151	146
PASSERIFORMES	THRAUPIDAE		Piranga flava	26.9917	-108.383	25	6	1936	170154	146
PASSERIFORMES	THRAUPIDAE		Piranga flava	26.9917	-108.383	22	6	1936	170155	146
PASSERIFORMES	THRAUPIDAE		Piranga flava	26.9917	-108.383	26	6	1936	170156	146
PASSERIFORMES	THRAUPIDAE		Piranga flava	26.9917	-108.383	4	7	1936	170148	146
PASSERIFORMES	THRAUPIDAE		Piranga flava	26.9917	-108.383	10	7	1936	170152	146
PASSERIFORMES	THRAUPIDAE		Piranga flava	26.9917	-108.383	8	7	1936	170153	146
PASSERIFORMES	THRAUPIDAE		Piranga flava	26.9917	-108.383	1	7	1936	170158	146
PASSERIFORMES	THRAUPIDAE		Piranga ludoviciana	25.8067	-108.488	7	5	1934	171826	49
PASSERIFORMES	THRAUPIDAE		Piranga rubra	26.9917	-108.383	12	7	1936	171061	146
PASSERIFORMES	THRAUPIDAE		Piranga rubra	25.46	-108.078	21	9	1933	171078	51
PASSERIFORMES	THRAUPIDAE		Piranga rubra	27.6067	-109.935	19	9	1954	171120	37
PASSERIFORMES	THRAUPIDAE		Piranga rubra	27.6067	-109.935	19	9	1954	171381	37
PASSERIFORMES	PARIDAE		Poecile sclateri	26.9917	-108.383	24	6	1936	89035	146
PASSERIFORMES	PARIDAE		Poecile sclateri	26.9917	-108.383	20	6	1936	89036	146
PASSERIFORMES	PARIDAE		Poecile sclateri	26.9917	-108.383	20	6	1936	89042	146
PASSERIFORMES	PARIDAE		Poecile sclateri	26.9917	-108.383	9	7	1936	89034	146
PASSERIFORMES	PARIDAE		Poecile sclateri	26.9917	-108.383	17	7	1936	89037	146
PASSERIFORMES	PARIDAE		Poecile sclateri	26.9917	-108.383	17	7	1936	89038	146
PASSERIFORMES	PARIDAE		Poecile sclateri	26.9917	-108.383	1	7	1936	89039	146
PASSERIFORMES	HIRUNDINIDAE		Progne subis	26.35	-109.133	18	5	1937	85452	8
PASSERIFORMES	HIRUNDINIDAE		Progne subis	27.9233	-110.708	18	6	1955	85434	10
PASSERIFORMES	HIRUNDINIDAE		Progne subis	27.9233	-110.708	18	6	1955	85435	10
PASSERIFORMES	HIRUNDINIDAE		Progne subis	27.9233	-110.708	19	6	1955	85436	10
PASSERIFORMES	HIRUNDINIDAE		Progne subis	27.9233	-110.708	19	6	1955	85437	10
PASSERIFORMES	HIRUNDINIDAE		Progne subis	25.65	-108.597	18	8	1968	85427	23
PASSERIFORMES	HIRUNDINIDAE		Progne subis	25.65	-108.597	18	8	1968	85428	23
PASSERIFORMES	HIRUNDINIDAE		Progne subis	25.65	-108.597	18	8	1968	85429	23
PASSERIFORMES	PTILOGONATIDAE		Ptilogonys cinereus	26.9917	-108.383	21	6	1936	136587	146
PASSERIFORMES	TYRANNIDAE		Pyrocephalus rubinus	26.415	-108.622	12	5	1933	47962	78
PASSERIFORMES	TYRANNIDAE		Pyrocephalus rubinus	24.7967	-107.402	29	5	1934	47961	56
PASSERIFORMES	TYRANNIDAE		Pyrocephalus rubinus	26.35	-109.133	19	5	1937	48074	8
PASSERIFORMES	TYRANNIDAE		Pyrocephalus rubinus	26.3817	-108.473	6	6	1888	47038	197
PASSERIFORMES	TYRANNIDAE		Pyrocephalus rubinus	26.35	-109.133	9	6	1930	48073	8
PASSERIFORMES	TYRANNIDAE		Pyrocephalus rubinus	24.7967	-107.402	10	6	1934	47958	56
PASSERIFORMES	TYRANNIDAE		Pyrocephalus rubinus	24.7967	-107.402	6	6	1934	47960	56
PASSERIFORMES	TYRANNIDAE		Pyrocephalus rubinus	26.455	-108.552	12	6	1963	47948	135
PASSERIFORMES	TYRANNIDAE		Pyrocephalus rubinus	25.915	-109.165	26	8	1933	47950	10
PASSERIFORMES	TYRANNIDAE		Pyrocephalus rubinus	25.915	-109.165	8	9	1933	47949	10
PASSERIFORMES	THRAUPIDAE		Rhodinocichla rosea	26.455	-108.552	13	6	1963	166261	135
PASSERIFORMES	TURDIDAE		Ridgwayia pinicola	26.9917	-108.383	12	7	1936	128266	146
PASSERIFORMES	TURDIDAE		Ridgwayia pinicola	26.9917	-108.383	10	7	1936	128267	146
PASSERIFORMES	TURDIDAE		Ridgwayia pinicola	26.9917	-108.383	6	7	1936	128268	146
PASSERIFORMES	TURDIDAE		Ridgwayia pinicola	26.9917	-108.383	11	7	1936	128270	146
PASSERIFORMES	TURDIDAE		Ridgwayia pinicola	26.9917	-108.383	11	7	1936	128271	146
PASSERIFORMES	TYRANNIDAE		Sayornis nigricans	26.455	-108.552	15	6	1953	45808	135
PASSERIFORMES	TYRANNIDAE		Sayornis nigricans	26.455	-108.552	14	6	1963	45809	135
PASSERIFORMES	TYRANNIDAE		Sayornis nigricans	25.46	-108.078	23	9	1933	45820	51
PASSERIFORMES	TYRANNIDAE		Sayornis nigricans	25.46	-108.078	24	9	1933	45821	51
PASSERIFORMES	TYRANNIDAE		Sayornis saya	27.9183	-110.898	14	6	1887	46672	4
PASSERIFORMES	TYRANNIDAE		Sayornis saya	27.9183	-110.898	12	6	1887	46673	4
PASSERIFORMES	TURDIDAE		Sialia sialis	26.9917	-108.383	27	6	1936	114306	146
PASSERIFORMES	TURDIDAE		Sialia sialis	26.9917	-108.383	24	6	1936	114308	146
PASSERIFORMES	TURDIDAE		Sialia sialis	26.9917	-108.383	23	6	1936	114310	146
PASSERIFORMES	TURDIDAE		Sialia sialis	26.9917	-108.383	28	6	1936	114312	146
PASSERIFORMES	TURDIDAE		Sialia sialis	26.9917	-108.383	7	7	1936	114309	146
PASSERIFORMES	TURDIDAE		Sialia sialis	26.9917	-108.383	5	7	1936	114311	146
PASSERIFORMES	TURDIDAE		Sialia sialis	26.9917	-108.383	7	7	1936	114314	146
PASSERIFORMES	TURDIDAE		Sialia sialis	26.9917	-108.383	1	7	1936	114316	146
PASSERIFORMES	TURDIDAE		Sialia sialis	26.9917	-108.383	1	7	1936	114317	146
PASSERIFORMES	TURDIDAE		Sialia sialis	26.9917	-108.383	11	7	1936	114318	146
PASSERIFORMES	SITTIDAE		Sitta carolinensis	26.9917	-108.383	23	6	1936	93388	146
PASSERIFORMES	SITTIDAE		Sitta carolinensis	26.9917	-108.383	2	7	1936	93390	146
PASSERIFORMES	SITTIDAE		Sitta carolinensis	26.9917	-108.383	18	7	1936	93392	146
PASSERIFORMES	SITTIDAE		Sitta carolinensis	26.9917	-108.383	12	7	1936	93395	146
PASSERIFORMES	SITTIDAE		Sitta carolinensis	26.9917	-108.383	11	7	1936	93396	146
PASSERIFORMES	SITTIDAE		Sitta carolinensis	26.9917	-108.383	14	7	1936	93397	146
PASSERIFORMES	SITTIDAE		Sitta carolinensis	26.9917	-108.383	14	7	1936	93398	146
PASSERIFORMES	SITTIDAE		Sitta carolinensis	26.9917	-108.383	11	7	1936	93399	146
PASSERIFORMES	SITTIDAE		Sitta carolinensis	26.9917	-108.383	3	7	1936	93400	146
PASSERIFORMES	SITTIDAE		Sitta carolinensis	26.9917	-108.383	3	7	1936	93401	146
PASSERIFORMES	SITTIDAE		Sitta carolinensis	26.9917	-108.383	2	7	1936	93402	146
PICIFORMES	PICIDAE		Sphyrapicus thyroideus	26.9917	-108.383	16	9	1935	13025	146
PASSERIFORMES	CARDINALIDAE		Spiza americana	24.7583	-107.662	20	5	1963	223559	15
PASSERIFORMES	EMBERIZIDAE		Spizella passerina	26.9917	-108.383	28	6	1936	197246	146
PASSERIFORMES	HIRUNDINIDAE		Tachycineta albilinea	27.3167	-110.592	30	5	1930	85995	21
PASSERIFORMES	HIRUNDINIDAE		Tachycineta albilinea	27.3167	-110.592	30	5	1930	85996	21
PASSERIFORMES	HIRUNDINIDAE		Tachycineta albilinea	27.8989	-110.588	12	5	1930	85997	90
PASSERIFORMES	HIRUNDINIDAE		Tachycineta albilinea	27.8989	-110.588	12	5	1930	85998	90
PASSERIFORMES	HIRUNDINIDAE		Tachycineta albilinea	24.6317	-107.93	6	5	1962	85973	3
PASSERIFORMES	HIRUNDINIDAE		Tachycineta albilinea	25.1167	-108	6	5	1962	85975	17
PASSERIFORMES	HIRUNDINIDAE		Tachycineta albilinea	26.35	-109.133	9	6	1930	85991	8
PASSERIFORMES	HIRUNDINIDAE		Tachycineta albilinea	25.5883	-109.098	7	8	1967	85979	-4
PASSERIFORMES	HIRUNDINIDAE		Tachycineta albilinea	25.6	-109.048	7	8	1967	85986	23
PASSERIFORMES	HIRUNDINIDAE		Tachycineta albilinea	25.6	-109.048	7	8	1967	85988	23
PASSERIFORMES	HIRUNDINIDAE		Tachycineta bicolor	25.6	-109.048	7	8	1967	85844	23
PASSERIFORMES	TURDIDAE		Turdus assimilis	26.9917	-108.383	23	6	1936	124871	146
PASSERIFORMES	TURDIDAE		Turdus assimilis	26.9917	-108.383	6	7	1936	124867	146
PASSERIFORMES	TURDIDAE		Turdus assimilis	26.9917	-108.383	6	7	1936	124868	146
PASSERIFORMES	TURDIDAE		Turdus assimilis	26.9917	-108.383	6	7	1936	124869	146
PASSERIFORMES	TURDIDAE		Turdus assimilis	26.9917	-108.383	12	7	1936	124870	146
PASSERIFORMES	TURDIDAE		Turdus assimilis	26.9917	-108.383	16	7	1936	124873	146
PASSERIFORMES	TURDIDAE		Turdus migratorius	26.9917	-108.383	21	6	1936	127537	146
PASSERIFORMES	TURDIDAE		Turdus migratorius	26.9917	-108.383	25	6	1936	127539	146
PASSERIFORMES	TURDIDAE		Turdus migratorius	26.9917	-108.383	25	6	1936	127541	146
PASSERIFORMES	TURDIDAE		Turdus migratorius	26.9917	-108.383	3	7	1936	127536	146
PASSERIFORMES	TURDIDAE		Turdus migratorius	26.9917	-108.383	17	7	1936	127538	146
PASSERIFORMES	TURDIDAE		Turdus migratorius	26.9917	-108.383	2	7	1936	127540	146
PASSERIFORMES	TURDIDAE		Turdus migratorius	26.9917	-108.383	1	7	1936	127543	146
PASSERIFORMES	TURDIDAE		Turdus migratorius	26.9917	-108.383	29	7	1936	127545	146
PASSERIFORMES	TURDIDAE		Turdus migratorius	26.9917	-108.383	1	7	1936	127546	146
PASSERIFORMES	TURDIDAE		Turdus migratorius	26.9917	-108.383	14	7	1936	127547	146
PASSERIFORMES	TURDIDAE		Turdus migratorius	26.9917	-108.383	12	7	1936	127548	146
PASSERIFORMES	TURDIDAE		Turdus rufopalliatus	25.1033	-108.033	4	6	1904	126045	9
PASSERIFORMES	TURDIDAE		Turdus rufopalliatus	25.1033	-108.033	2	6	1904	126046	9
PASSERIFORMES	TURDIDAE		Turdus rufopalliatus	26.455	-108.552	15	6	1963	125993	135
PASSERIFORMES	TURDIDAE		Turdus rufopalliatus	25.46	-108.078	23	9	1933	126038	51
PASSERIFORMES	TURDIDAE		Turdus rufopalliatus	25.46	-108.078	27	9	1933	126039	51
PASSERIFORMES	TYRANNIDAE		Tyrannus crassirostris	26.08	-108.758	23	5	1925	61938	40
PASSERIFORMES	TYRANNIDAE		Tyrannus crassirostris	25.08	-108.053	7	5	1934	61931	7
PASSERIFORMES	TYRANNIDAE		Tyrannus crassirostris	27.585	-110.005	9	6	1933	62000	29
PASSERIFORMES	TYRANNIDAE		Tyrannus crassirostris	25.9533	-109.052	20	6	1955	61863	54
PASSERIFORMES	TYRANNIDAE		Tyrannus crassirostris	26.455	-108.552	12	6	1963	61868	135
PASSERIFORMES	TYRANNIDAE		Tyrannus crassirostris	26.455	-108.552	16	6	1963	61869	135
PASSERIFORMES	TYRANNIDAE		Tyrannus crassirostris	25.545	-108.088	18	7	1963	62007	74
PASSERIFORMES	TYRANNIDAE		Tyrannus crassirostris	25.5867	-108.085	18	7	1963	61580	96
PASSERIFORMES	TYRANNIDAE		Tyrannus crassirostris	25.46	-108.078	26	9	1933	61906	51
PASSERIFORMES	TYRANNIDAE		Tyrannus crassirostris	25.46	-108.078	30	9	1933	61909	51
PASSERIFORMES	TYRANNIDAE		Tyrannus crassirostris	25.46	-108.078	21	9	1933	61910	51
PASSERIFORMES	TYRANNIDAE		Tyrannus crassirostris	25.46	-108.078	29	9	1933	62023	51
PASSERIFORMES	TYRANNIDAE		Tyrannus crassirostris	27.6067	-109.935	21	9	1954	62006	37
PASSERIFORMES	TYRANNIDAE		Tyrannus verticalis	25.1033	-108.033	1	6	1904	62260	9
PASSERIFORMES	TYRANNIDAE		Tyrannus verticalis	25.46	-108.078	18	9	1933	62258	51
PASSERIFORMES	TYRANNIDAE		Tyrannus vociferans	26.08	-108.758	23	5	1925	61368	40
PASSERIFORMES	TYRANNIDAE		Tyrannus vociferans	27.15	-109.4	23	6	1937	61472	42
PASSERIFORMES	TYRANNIDAE		Tyrannus vociferans	27.15	-109.4	20	6	1937	61476	42
PASSERIFORMES	TYRANNIDAE		Tyrannus vociferans	27.5483	-109.95	2	6	1954	61400	33
PASSERIFORMES	TYRANNIDAE		Tyrannus vociferans	25.9533	-109.035	20	6	1955	61337	8
PASSERIFORMES	TYRANNIDAE		Tyrannus vociferans	27.595	-109.922	15	7	1963	60618	37
PASSERIFORMES	TYRANNIDAE		Tyrannus vociferans	25.915	-109.165	3	8	1933	61341	10
PASSERIFORMES	VIREONIDAE		Vireo flavoviridis	24.7967	-107.402	31	5	1934	73549	56
PASSERIFORMES	VIREONIDAE		Vireo flavoviridis	26.3817	-108.473	6	6	1888	73114	197
PASSERIFORMES	VIREONIDAE		Vireo flavoviridis	25.8	-108.483	1	6	1934	73520	48
PASSERIFORMES	VIREONIDAE		Vireo flavoviridis	24.7967	-107.402	17	6	1934	73542	56
PASSERIFORMES	VIREONIDAE		Vireo flavoviridis	24.7967	-107.402	9	6	1934	73543	56
PASSERIFORMES	VIREONIDAE		Vireo flavoviridis	24.7967	-107.402	13	6	1934	73544	56
PASSERIFORMES	VIREONIDAE		Vireo flavoviridis	24.7967	-107.402	9	6	1934	73545	56
PASSERIFORMES	VIREONIDAE		Vireo flavoviridis	24.7967	-107.402	2	6	1934	73546	56
PASSERIFORMES	VIREONIDAE		Vireo flavoviridis	24.7967	-107.402	12	6	1934	73547	56
PASSERIFORMES	VIREONIDAE		Vireo flavoviridis	24.7967	-107.402	3	6	1934	73548	56
PASSERIFORMES	VIREONIDAE		Vireo flavoviridis	24.7967	-107.402	9	6	1934	73550	56
PASSERIFORMES	VIREONIDAE		Vireo flavoviridis	24.7967	-107.402	9	6	1934	73551	56
PASSERIFORMES	VIREONIDAE		Vireo flavoviridis	24.7967	-107.402	2	6	1934	73719	56
PASSERIFORMES	VIREONIDAE		Vireo flavoviridis	25.9533	-109.052	20	6	1955	73514	54
PASSERIFORMES	VIREONIDAE		Vireo flavoviridis	25.9533	-109.052	20	6	1955	73515	54
PASSERIFORMES	VIREONIDAE		Vireo flavoviridis	25.9533	-109.052	20	6	1955	73516	54
PASSERIFORMES	VIREONIDAE		Vireo flavoviridis	26.4233	-108.595	14	6	1963	73517	91
PASSERIFORMES	VIREONIDAE		Vireo flavoviridis	26.455	-108.552	16	6	1963	73519	135
PASSERIFORMES	VIREONIDAE		Vireo gilvus	25.08	-108.053	5	5	1934	72386	7
PASSERIFORMES	VIREONIDAE		Vireo gilvus	25.08	-108.053	3	5	1934	72388	7
PASSERIFORMES	VIREONIDAE		Vireo gilvus	26.35	-109.133	1	5	1947	249189	8
PASSERIFORMES	VIREONIDAE		Vireo gilvus	26.35	-109.133	2	5	1947	249190	8
PASSERIFORMES	VIREONIDAE		Vireo gilvus	26.9917	-108.383	21	6	1936	72344	146
PASSERIFORMES	VIREONIDAE		Vireo gilvus	26.9917	-108.383	22	6	1936	72345	146
PASSERIFORMES	VIREONIDAE		Vireo gilvus	26.9917	-108.383	30	6	1936	249186	146
PASSERIFORMES	VIREONIDAE		Vireo gilvus	26.9917	-108.383	18	7	1936	72340	146
PASSERIFORMES	VIREONIDAE		Vireo gilvus	26.9917	-108.383	1	7	1936	72342	146
PASSERIFORMES	VIREONIDAE		Vireo gilvus	26.9917	-108.383	9	7	1936	72343	146
PASSERIFORMES	VIREONIDAE		Vireo gilvus	26.9917	-108.383	14	7	1936	72346	146
PASSERIFORMES	VIREONIDAE		Vireo gilvus	25.46	-108.078	23	9	1933	72362	51
PASSERIFORMES	VIREONIDAE		Vireo huttoni	26.9917	-108.383	22	6	1936	71142	146
PASSERIFORMES	VIREONIDAE		Vireo huttoni	26.9917	-108.383	26	6	1936	71145	146
PASSERIFORMES	VIREONIDAE		Vireo huttoni	26.9917	-108.383	24	6	1936	71148	146
PASSERIFORMES	VIREONIDAE		Vireo huttoni	26.9917	-108.383	27	6	1936	71152	146
PASSERIFORMES	VIREONIDAE		Vireo huttoni	26.9917	-108.383	20	6	1936	71153	146
PASSERIFORMES	VIREONIDAE		Vireo huttoni	26.9917	-108.383	10	7	1936	71138	146
PASSERIFORMES	VIREONIDAE		Vireo huttoni	26.9917	-108.383	3	7	1936	71140	146
PASSERIFORMES	VIREONIDAE		Vireo huttoni	26.9917	-108.383	16	7	1936	71141	146
PASSERIFORMES	VIREONIDAE		Vireo huttoni	26.9917	-108.383	12	7	1936	71144	146
PASSERIFORMES	VIREONIDAE		Vireo huttoni	26.9917	-108.383	3	7	1936	71149	146
PASSERIFORMES	VIREONIDAE		Vireo huttoni	26.9917	-108.383	16	7	1936	71150	146
PASSERIFORMES	VIREONIDAE		Vireo huttoni	26.9917	-108.383	15	7	1936	71151	146
PASSERIFORMES	VIREONIDAE		Vireo huttoni	27.5167	-109.25	1	8	1888	70490	199
PASSERIFORMES	VIREONIDAE		Vireo hypochryseus	24.0217	-106.972	27	7	1961	71544	20
PASSERIFORMES	VIREONIDAE		Vireo pallens	24.86	-108.1	9	5	1934	68950	3
PASSERIFORMES	VIREONIDAE		Vireo pallens	26.3656	-109.237	14	5	1937	68952	1
PASSERIFORMES	DENDROCOLAPTIDAE		Xiphorhynchus flavigaster	25.1033	-108.033	3	6	1904	25324	9
PASSERIFORMES	EMBERIZIDAE		Zonotrichia leucophrys	26.415	-108.622	13	5	1933	206954	78

## Sheet: Sheet1
Early Collecting
Species	May	June	July	August
Agelaius phoeniceus				1
Aimophila botterii	7
Aimophila carpalis	9	9	1
Aimophila ruficeps		14	4
Amazilia rutila	1	1
Amazilia violiceps		16		15
Amphispiza bilineata		2	1
Aphelocoma ultramarina	1
Arremonops rufivirgatus	1	1
Atthis heloisa	1
Attila spadiceus			1
Auriparus flaviceps	8	6	1
Baeolophus wollweberi		4	8
Basileuterus rufifrons			2
Cacicus melanicterus		27
Calocitta colliei	1	6
Camptostoma imberbe	9	4		1
Campylorhynchus brunneicapillus	2	4	1
Cardinalis cardinalis	7	5		2
Cardinalis sinuatus	2	5
Carduelis notata		6	4
Carduelis psaltria		2		4
Carpodacus mexicanus	12	21		3
Catharus aurantiirostris	1
Certhia americana		3	9
Chondestes grammacus				1
Coccothraustes abeillei		2	8
Coccyzus americanus		3
Colaptes auratus		6	1
Colaptes chrysoides	5	2	1	1
Contopus pertinax		3	4
Contopus sordidulus	5
Corvus corax		4
Corvus sinaloae	8	10	1	4
Crotophaga sulcirostris	1	7	2	8
Cyanocitta stelleri		2	3
Cyanocorax beecheii	2	8
Cynanthus latirostris	1	5	1	2
Dendroica petechia	19
Dryocopus lineatus		3
Empidonax affinis		1
Empidonax difficilis	3			1
Empidonax traillii	8	6
Geococcyx californianus	2	5		1
Geothlypis trichas	6	7
Granatellus venustus	2
Heliomaster constantii	1	18
Hylocharis leucotis			3
Icteria virens	5	10		4
Icterus bullockii	2	2
Icterus cucullatus	3	4
Icterus pustulatus		18	1
Icterus spurius		4		1
Icterus wagleri		2
Lepidocolaptes leucogaster		1	6
Melanerpes chrysogenys		1
Melanerpes formicivorus		2	8
Melanerpes hypopolius			1
Melanerpes uropygialis	4	8	5	1
Melanotis caerulescens	2	2	1
Melospiza melodia		2
Mimus polyglottos				1
Mitrephanes phaeocercus		3	7
Molothrus aeneus	9	8	1	2
Molothrus ater	3	4		1
Myadestes occidentalis		5	5
Myiarchus cinerascens	2	6
Myiarchus nuttingi	4	3
Myiarchus tuberculifer	5	11	8	2
Myiarchus tyrannulus	13	9
Myioborus miniatus		7	3
Myiodynastes luteiventris		5
Myiozetetes similis	7	8		4
Pachyramphus aglaiae	8	12		6
Parula pitiayumi			1
Parula superciliosa		2
Passerculus sandwichensis	45	1
Passerina ciris				9
Passerina versicolor	7	10	1
Petrochelidon pyrrhonota		3		1
Peucedramus taeniatus			6
Phainopepla nitens		1	1
Pheucticus chrysopeplus		12
Pheucticus melanocephalus		6	7	1
Piaya cayana		1	1
Picoides scalaris	2	4		1
Picoides stricklandi		3	4
Piculus auricularis			2
Pipilo chlorurus	2
Pipilo fuscus	3	4
Piranga bidentata		1	2
Piranga erythrocephala		1
Piranga flava		5	4
Piranga ludoviciana	1
Piranga rubra			1
Pitangus sulphuratus	4	6	1	3
Poecile sclateri		3	4
Polioptila melanura		1
Polioptila nigriceps	6	6		4
Progne subis	1	4		3
Psaltriparus minimus			15
Ptilogonys cinereus		1
Pyrocephalus rubinus	3	5		1
Quiscalus mexicanus	4	7	3
Rhodinocichla rosea		1
Ridgwayia pinicola			5
Saltator coerulescens	4	4		5
Sayornis nigricans		2
Sayornis saya		2
Sialia sialis		4	6
Sitta carolinensis		1	10
Spiza americana	1
Spizella passerina		1
Sporophila torqueola	3	5
Stelgidopteryx serripennis		3
Tachycineta albilinea	6	1		3
Tachycineta bicolor				1
Thryothorus felix	2	7	1	1
Thryothorus sinaloa	1	7
Toxostoma bendirei		1
Toxostoma curvirostre	12	10	4	1
Turdus assimilis		1	5
Turdus migratorius		3	8
Turdus rufopalliatus		3
Tyrannus crassirostris	2	4	2
Tyrannus melancholicus	11	19	2	5
Tyrannus verticalis		1
Tyrannus vociferans	1	4	1	1
Vermivora luciae		4		1
Vireo bellii	2			1
Vireo flavoviridis	1	17
Vireo gilvus	4	3	4
Vireo huttoni		5	7	1
Vireo hypochryseus			1
Vireo pallens	2
Volatinia jacarina		3	1
Xiphorhynchus flavigaster		1
Zonotrichia leucophrys	1
Totals	323	569	212	109
